# Supplementary material for: Harmonic Scale Factors of Fundamental Transitions for Dispersion‐corrected Quantum Chemical Methods
Source: PubMed Central journal article supplement (PMC11614367; doi:10.1002/cphc.202400547), 2024-10-28
Supplement: CPHC-25-e202400547-s001.pdf [file CPHC-25-e202400547-s001.pdf]

# ChemPhysChem

Supporting Information

## Harmonic Scale Factors of Fundamental Transitions for Dispersion-corrected Quantum Chemical Methods

Denis S. Tikhonov,\* Igor Gordiy, Danila A. Iakovlev, Alisa A. Gorislav, Mikhail A. Kalinin, Sergei A. Nikolenko, Ksenia M. Malaskeevich, Karina Yureva, Nikita A. Matsokin, and Melanie Schnell

# Supporting Information:

## Harmonic scale factors of fundamental transitions for dispersion-corrected quantum chemical methods

### Contents

|          |                                                         |             |
|----------|---------------------------------------------------------|-------------|
| <b>1</b> | <b>Scale factors statistics</b>                         | <b>S-2</b>  |
| 1.1      | Numerical data . . . . .                                | S-2         |
| 1.2      | Histograms . . . . .                                    | S-6         |
| 1.2.1    | Absolute deviations . . . . .                           | S-6         |
| 1.2.2    | Relative deviations . . . . .                           | S-11        |
| <b>2</b> | <b>Illustrative examples</b>                            | <b>S-16</b> |
| 2.1      | Pyrene . . . . .                                        | S-16        |
| 2.2      | Protonated LeuEnk . . . . .                             | S-22        |
| 2.2.1    | FELIX spectrum . . . . .                                | S-23        |
| 2.2.2    | CLIO spectrum . . . . .                                 | S-26        |
| 2.3      | Doubly protonated conformer A of gramicidin S . . . . . | S-29        |

# 1 Scale factors statistics

## 1.1 Numerical data

**Table S1** Scale factors obtained for the 27 dispersion-corrected quantum-chemical methods.

| Method                 | Absolute scale factor $s_{\text{abs}}$ | Relative scale factor $s_{\text{rel}}$ |
|------------------------|----------------------------------------|----------------------------------------|
| BLYP-D3BJ/6-31G        | $0.99110 \pm 0.00063$                  | $1.01754 \pm 0.00160$                  |
| BLYP-D3BJ/def2-SVP     | $0.99716 \pm 0.00035$                  | $1.01325 \pm 0.00113$                  |
| BLYP-D3BJ/def2-TZVP    | $0.99598 \pm 0.00035$                  | $1.01683 \pm 0.00105$                  |
| BLYP-D4/6-31G          | $0.99123 \pm 0.00063$                  | $1.01739 \pm 0.00160$                  |
| BLYP-D4/def2-SVP       | $0.99727 \pm 0.00035$                  | $1.01312 \pm 0.00114$                  |
| BLYP-D4/def2-TZVP      | $0.99611 \pm 0.00035$                  | $1.01679 \pm 0.00105$                  |
| PBE-D3BJ/6-31G         | $0.98478 \pm 0.00059$                  | $1.01017 \pm 0.00152$                  |
| PBE-D3BJ/def2-SVP      | $0.99035 \pm 0.00036$                  | $1.00564 \pm 0.00109$                  |
| PBE-D3BJ/def2-TZVP     | $0.99234 \pm 0.00033$                  | $1.01057 \pm 0.00100$                  |
| PBE-D4/6-31G           | $0.98491 \pm 0.00058$                  | $1.00960 \pm 0.00155$                  |
| PBE-D4/def2-SVP        | $0.99046 \pm 0.00036$                  | $1.00522 \pm 0.00112$                  |
| PBE-D4/def2-TZVP       | $0.99246 \pm 0.00033$                  | $1.01023 \pm 0.00103$                  |
| B3LYP-D3BJ/6-31G       | $0.96110 \pm 0.00054$                  | $0.98111 \pm 0.00143$                  |
| B3LYP-D3BJ/def2-SVP    | $0.96637 \pm 0.00030$                  | $0.97548 \pm 0.00103$                  |
| B3LYP-D3BJ/def2-TZVP   | $0.96712 \pm 0.00026$                  | $0.97854 \pm 0.00093$                  |
| B3LYP-D4/6-31G         | $0.96132 \pm 0.00054$                  | $0.98143 \pm 0.00142$                  |
| B3LYP-D4/def2-SVP      | $0.96657 \pm 0.00030$                  | $0.97586 \pm 0.00102$                  |
| B3LYP-D4/def2-TZVP     | $0.96733 \pm 0.00026$                  | $0.97897 \pm 0.00093$                  |
| PBE0-D3BJ/6-31G        | $0.95092 \pm 0.00049$                  | $0.96935 \pm 0.00132$                  |
| PBE0-D3BJ/def2-SVP     | $0.95550 \pm 0.00032$                  | $0.96308 \pm 0.00099$                  |
| PBE0-D3BJ/def2-TZVP    | $0.95908 \pm 0.00027$                  | $0.96723 \pm 0.00092$                  |
| PBE0-D4/6-31G          | $0.95100 \pm 0.00049$                  | $0.96931 \pm 0.00133$                  |
| PBE0-D4/def2-SVP       | $0.95557 \pm 0.00032$                  | $0.96303 \pm 0.00100$                  |
| PBE0-D4/def2-TZVP      | $0.95915 \pm 0.00027$                  | $0.96720 \pm 0.00093$                  |
| HF-3c                  | $0.83998 \pm 0.00060$                  | $0.85826 \pm 0.00140$                  |
| r <sup>2</sup> SCAN-3c | $0.93293 \pm 0.00026$                  | $0.93468 \pm 0.00094$                  |
| r <sup>2</sup> SCAN-3c | $0.96878 \pm 0.00029$                  | $0.98155 \pm 0.00106$                  |

**Table S2** Absolute root-mean-square deviations (aRMSD) for unscaled/ $s_{\text{abs}}$ -scaled/ $s_{\text{rel}}$ -scaled datasets. All values are in  $\text{cm}^{-1}$ .

| Method                 | Unscaled | $s_{\text{abs}}$ -scaled | $s_{\text{rel}}$ -scaled |
|------------------------|----------|--------------------------|--------------------------|
| BLYP-D3BJ/6-31G        | 74       | 72                       | 84                       |
| BLYP-D3BJ/def2-SVP     | 41       | 41                       | 48                       |
| BLYP-D3BJ/def2-TZVP    | 42       | 41                       | 52                       |
| BLYP-D4/6-31G          | 74       | 72                       | 83                       |
| BLYP-D4/def2-SVP       | 41       | 41                       | 48                       |
| BLYP-D4/def2-TZVP      | 41       | 41                       | 52                       |
| PBE-D3BJ/6-31G         | 72       | 67                       | 79                       |
| PBE-D3BJ/def2-SVP      | 45       | 42                       | 48                       |
| PBE-D3BJ/def2-TZVP     | 40       | 39                       | 48                       |
| PBE-D4/6-31G           | 72       | 67                       | 78                       |
| PBE-D4/def2-SVP        | 45       | 42                       | 48                       |
| PBE-D4/def2-TZVP       | 40       | 39                       | 47                       |
| B3LYP-D3BJ/6-31G       | 90       | 63                       | 71                       |
| B3LYP-D3BJ/def2-SVP    | 65       | 36                       | 39                       |
| B3LYP-D3BJ/def2-TZVP   | 62       | 32                       | 37                       |
| B3LYP-D4/6-31G         | 90       | 63                       | 72                       |
| B3LYP-D4/def2-SVP      | 64       | 36                       | 39                       |
| B3LYP-D4/def2-TZVP     | 61       | 32                       | 37                       |
| PBE0-D3BJ/6-31G        | 101      | 59                       | 66                       |
| PBE0-D3BJ/def2-SVP     | 82       | 39                       | 41                       |
| PBE0-D3BJ/def2-TZVP    | 74       | 33                       | 36                       |
| PBE0-D4/6-31G          | 101      | 59                       | 66                       |
| PBE0-D4/def2-SVP       | 82       | 39                       | 41                       |
| PBE0-D4/def2-TZVP      | 74       | 33                       | 36                       |
| HF-3c                  | 305      | 82                       | 89                       |
| r <sup>2</sup> SCAN-3c | 116      | 33                       | 33                       |
| r <sup>2</sup> SCAN-3c | 61       | 35                       | 41                       |

**Table S3** Relative root-mean-square deviations (rRMSD) for unscaled/ $s_{\text{abs}}$ -scaled/ $s_{\text{rel}}$ -scaled datasets. Values are dimensionless.

| Method                 | Unscaled | $s_{\text{abs}}$ -scaled | $s_{\text{rel}}$ -scaled |
|------------------------|----------|--------------------------|--------------------------|
| BLYP-D3BJ/6-31G        | 0.11282  | 0.11446                  | 0.11151                  |
| BLYP-D3BJ/def2-SVP     | 0.08529  | 0.08576                  | 0.08429                  |
| BLYP-D3BJ/def2-TZVP    | 0.07993  | 0.08084                  | 0.07821                  |
| BLYP-D4/6-31G          | 0.11328  | 0.11487                  | 0.11200                  |
| BLYP-D4/def2-SVP       | 0.08614  | 0.08658                  | 0.08516                  |
| BLYP-D4/def2-TZVP      | 0.08030  | 0.08117                  | 0.07859                  |
| PBE-D3BJ/6-31G         | 0.10712  | 0.10954                  | 0.10665                  |
| PBE-D3BJ/def2-SVP      | 0.08176  | 0.08296                  | 0.08157                  |
| PBE-D3BJ/def2-TZVP     | 0.07592  | 0.07732                  | 0.07520                  |
| PBE-D4/6-31G           | 0.10927  | 0.11154                  | 0.10886                  |
| PBE-D4/def2-SVP        | 0.08423  | 0.08533                  | 0.08407                  |
| PBE-D4/def2-TZVP       | 0.07803  | 0.07934                  | 0.07738                  |
| B3LYP-D3BJ/6-31G       | 0.10514  | 0.10535                  | 0.10338                  |
| B3LYP-D3BJ/def2-SVP    | 0.08360  | 0.08030                  | 0.07975                  |
| B3LYP-D3BJ/def2-TZVP   | 0.07555  | 0.07325                  | 0.07232                  |
| B3LYP-D4/6-31G         | 0.10491  | 0.10520                  | 0.10321                  |
| B3LYP-D4/def2-SVP      | 0.08327  | 0.08010                  | 0.07954                  |
| B3LYP-D4/def2-TZVP     | 0.07489  | 0.07273                  | 0.07176                  |
| PBE0-D3BJ/6-31G        | 0.10206  | 0.09892                  | 0.09709                  |
| PBE0-D3BJ/def2-SVP     | 0.08650  | 0.07799                  | 0.07759                  |
| PBE0-D3BJ/def2-TZVP    | 0.07993  | 0.07292                  | 0.07243                  |
| PBE0-D4/6-31G          | 0.10260  | 0.09943                  | 0.09764                  |
| PBE0-D4/def2-SVP       | 0.08714  | 0.07867                  | 0.07829                  |
| PBE0-D4/def2-TZVP      | 0.08043  | 0.07345                  | 0.07298                  |
| HF-3c                  | 0.20440  | 0.12393                  | 0.12211                  |
| r <sup>2</sup> SCAN-3c | 0.10345  | 0.07648                  | 0.07646                  |
| r <sup>2</sup> SCAN-3c | 0.08397  | 0.08287                  | 0.08185                  |

**Table S4** Number of molecules ( $N_{\text{mol}}$ ) and number of harmonic frequencies ( $N_{\text{freq}}$ ) in dataset that was used to obtain scale factors for a given quantum-chemical method.

| Method                 | $N_{\text{mol}}$ | $N_{\text{freq}}$ |
|------------------------|------------------|-------------------|
| BLYP-D3BJ/6-31G        | 341              | 5107              |
| BLYP-D3BJ/def2-SVP     | 441              | 5778              |
| BLYP-D3BJ/def2-TZVP    | 441              | 5778              |
| BLYP-D4/6-31G          | 341              | 5107              |
| BLYP-D4/def2-SVP       | 441              | 5778              |
| BLYP-D4/def2-TZVP      | 441              | 5778              |
| PBE-D3BJ/6-31G         | 341              | 5107              |
| PBE-D3BJ/def2-SVP      | 440              | 5739              |
| PBE-D3BJ/def2-TZVP     | 441              | 5778              |
| PBE-D4/6-31G           | 341              | 5107              |
| PBE-D4/def2-SVP        | 440              | 5739              |
| PBE-D4/def2-TZVP       | 441              | 5778              |
| B3LYP-D3BJ/6-31G       | 342              | 5113              |
| B3LYP-D3BJ/def2-SVP    | 441              | 5778              |
| B3LYP-D3BJ/def2-TZVP   | 441              | 5778              |
| B3LYP-D4/6-31G         | 342              | 5113              |
| B3LYP-D4/def2-SVP      | 441              | 5778              |
| B3LYP-D4/def2-TZVP     | 441              | 5778              |
| PBE0-D3BJ/6-31G        | 342              | 5113              |
| PBE0-D3BJ/def2-SVP     | 439              | 5706              |
| PBE0-D3BJ/def2-TZVP    | 441              | 5778              |
| PBE0-D4/6-31G          | 342              | 5113              |
| PBE0-D4/def2-SVP       | 439              | 5706              |
| PBE0-D4/def2-TZVP      | 441              | 5778              |
| HF-3c                  | 436              | 5667              |
| r <sup>2</sup> SCAN-3c | 440              | 5769              |
| r <sup>2</sup> SCAN-3c | 440              | 5754              |

## 1.2 Histograms

### 1.2.1 Absolute deviations

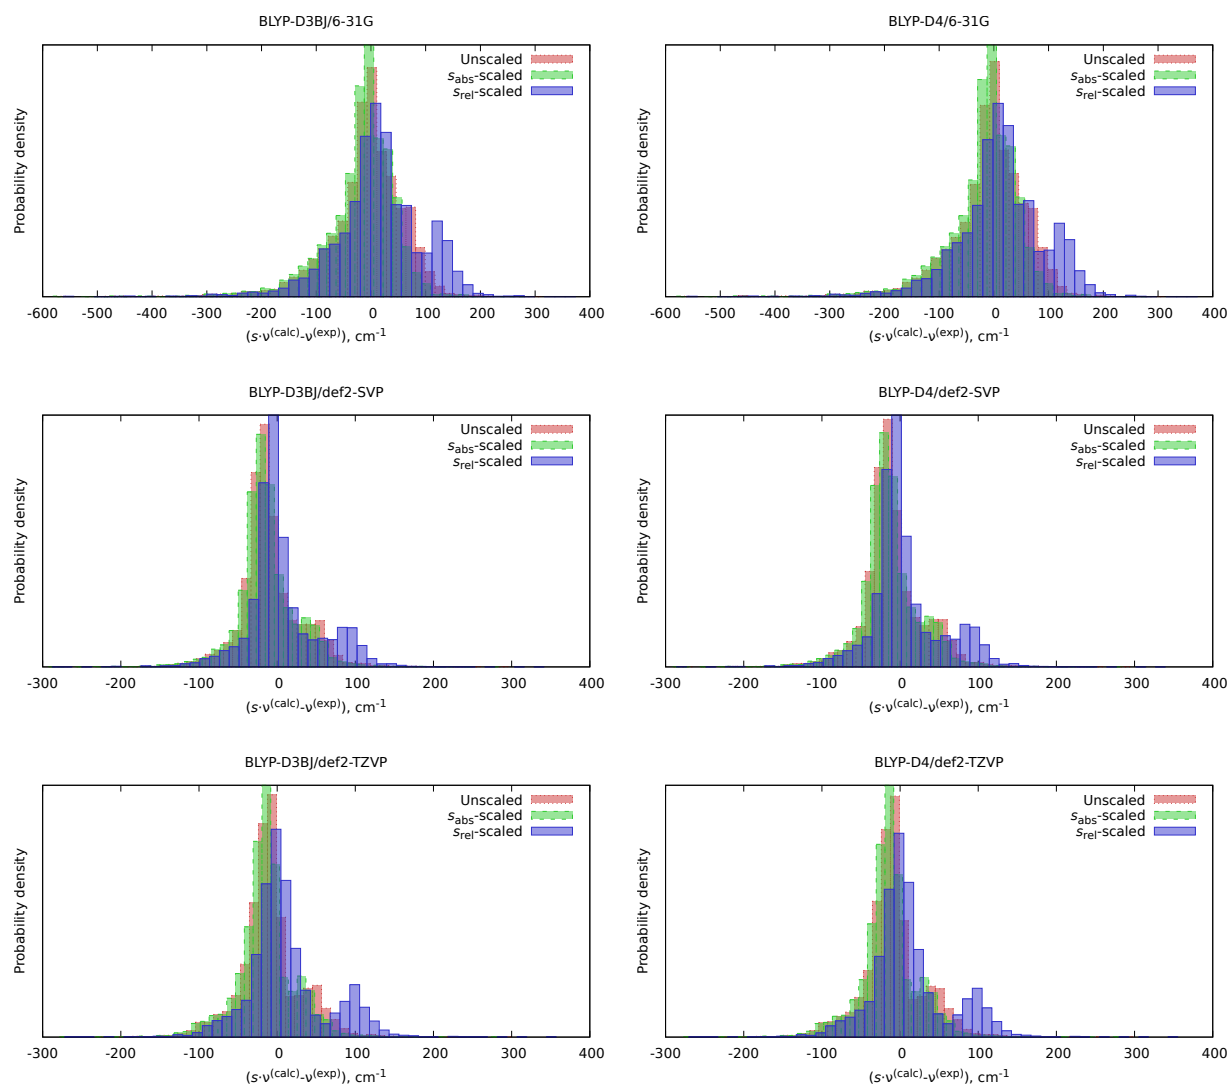

**Figure S1** Absolute deviations of the unscaled/ $s_{\text{abs}}$ -scaled/ $s_{\text{rel}}$ -scaled frequencies from the experimental fundamental transitions in the dataset for BLYP-based methods.

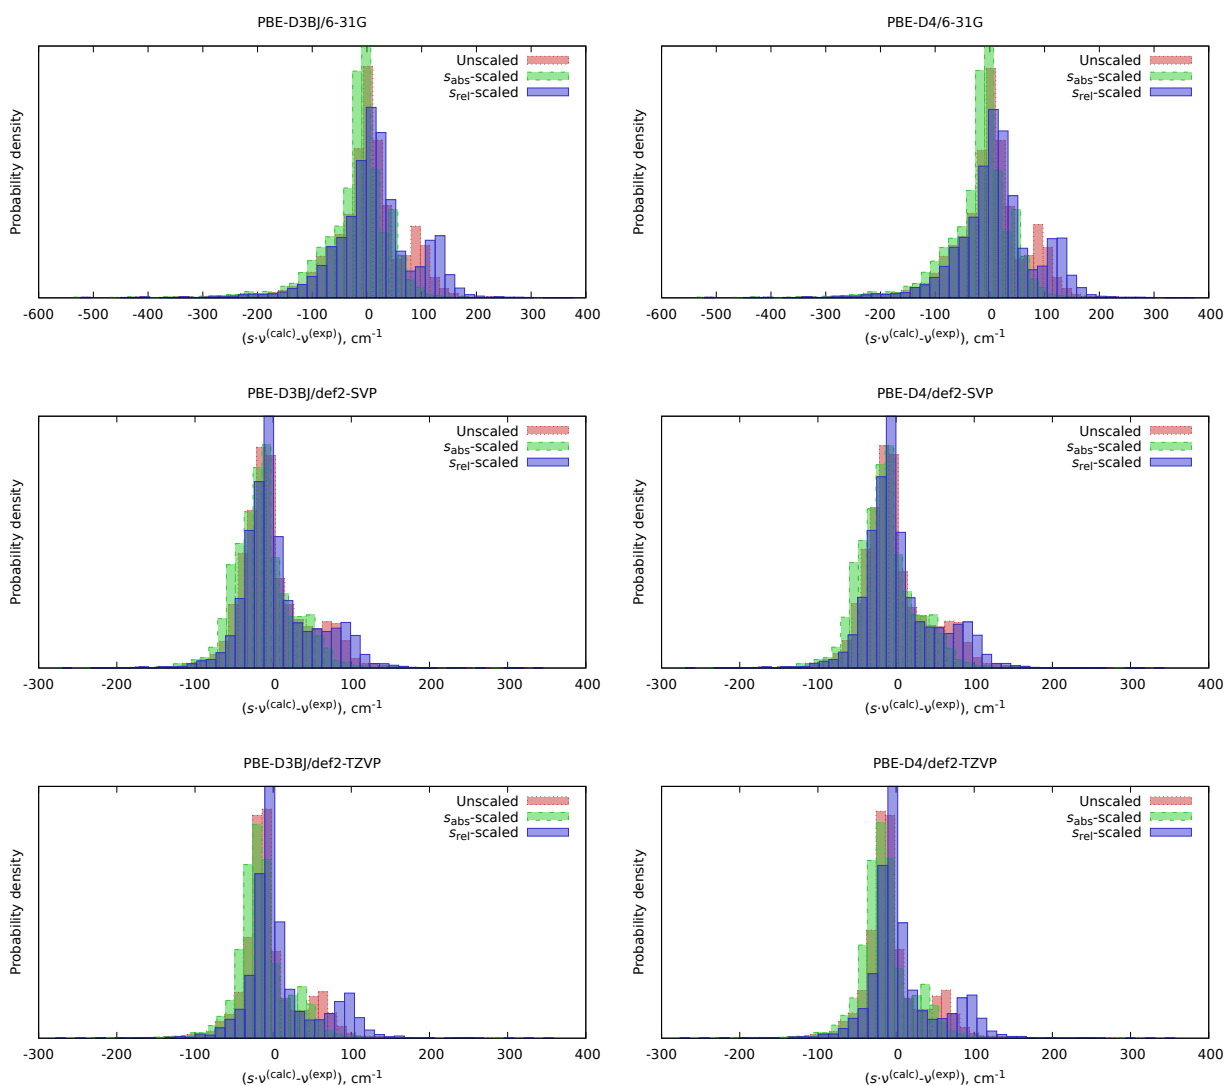

**Figure S2** Absolute deviations of the unscaled/ $s_{\text{abs}}$ -scaled/ $s_{\text{rel}}$ -scaled frequencies from the experimental fundamental transitions in the dataset for PBE-based methods.



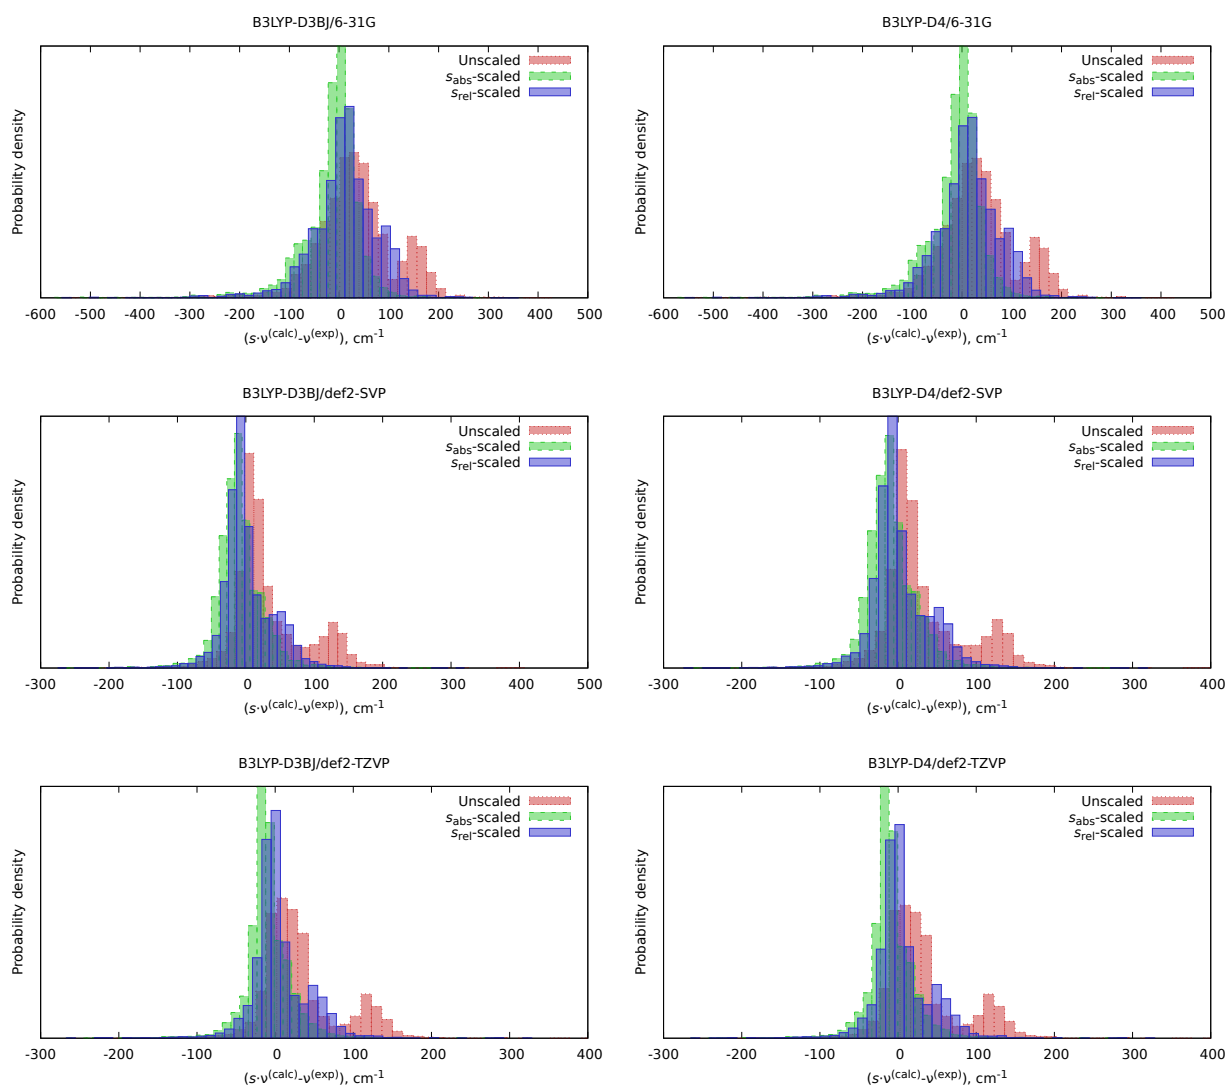

**Figure S3** Absolute deviations of the unscaled/ $s_{\text{abs}}$ -scaled/ $s_{\text{rel}}$ -scaled frequencies from the experimental fundamental transitions in the dataset for B3LYP-based methods.

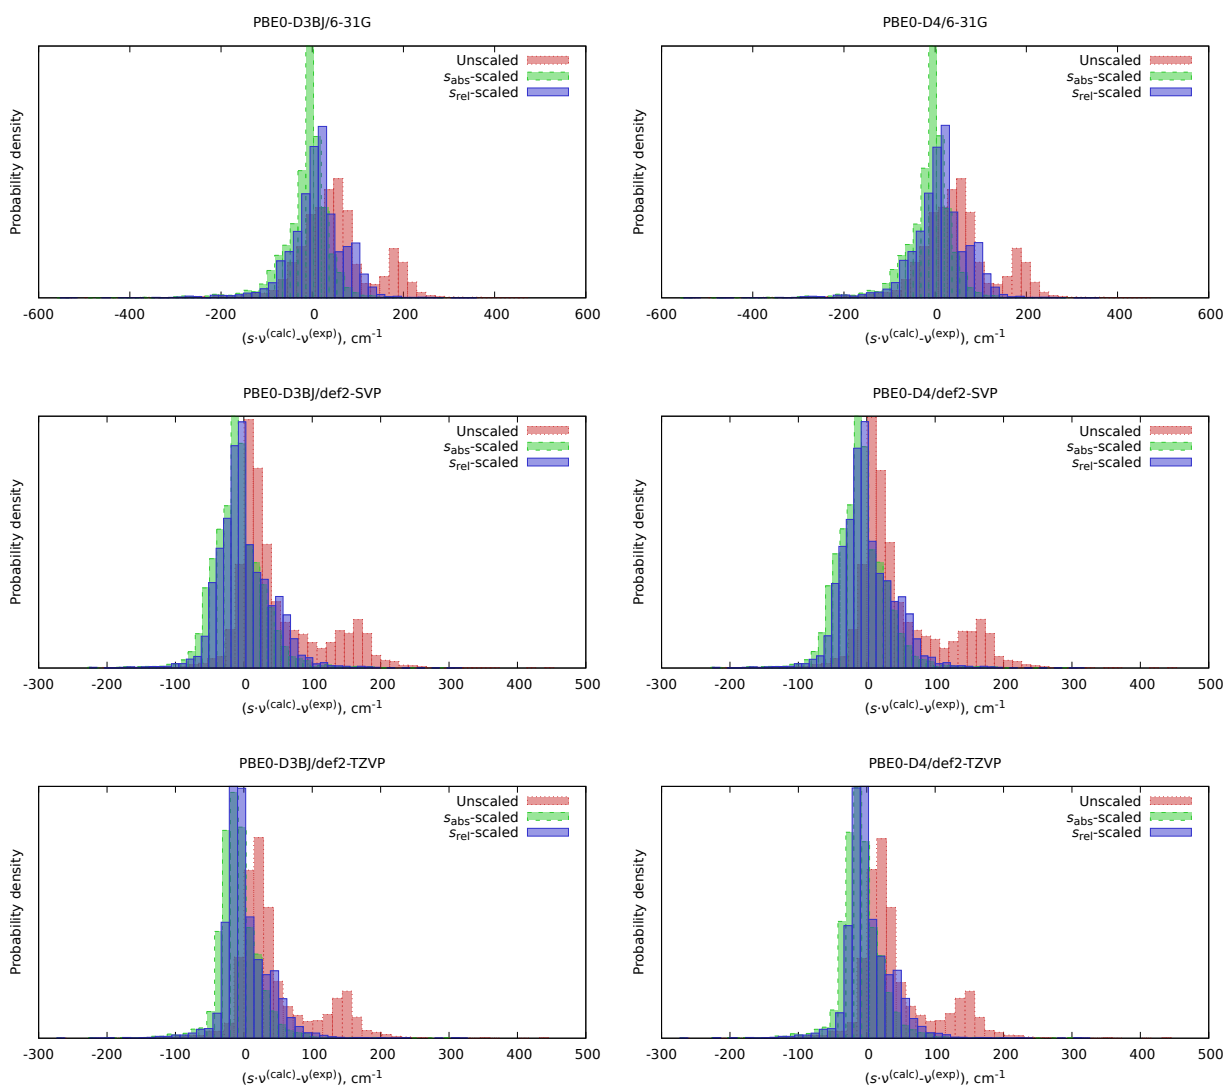

**Figure S4** Absolute deviations of the unscaled/ $s_{\text{abs}}$ -scaled/ $s_{\text{rel}}$ -scaled frequencies from the experimental fundamental transitions in the dataset for PBE0-based methods.

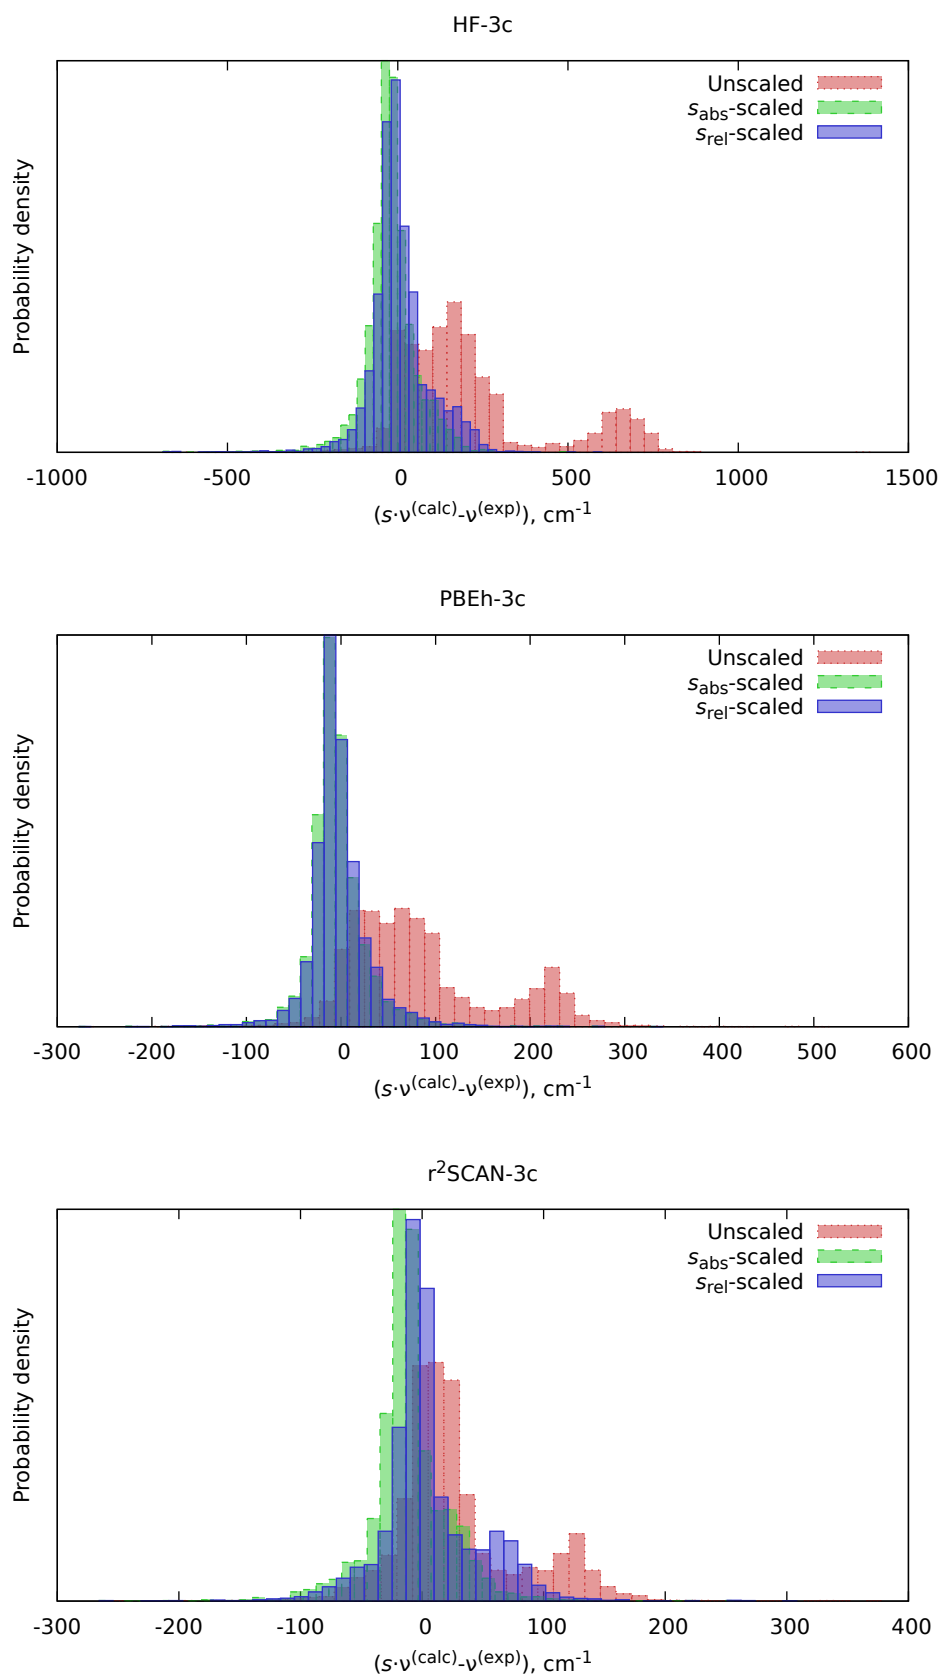

**Figure S5** Absolute deviations of the unscaled/ $s_{\text{abs}}$ -scaled/ $s_{\text{rel}}$ -scaled frequencies from the experimental fundamental transitions in the dataset for 3c composite methods.

## 1.2.2 Relative deviations

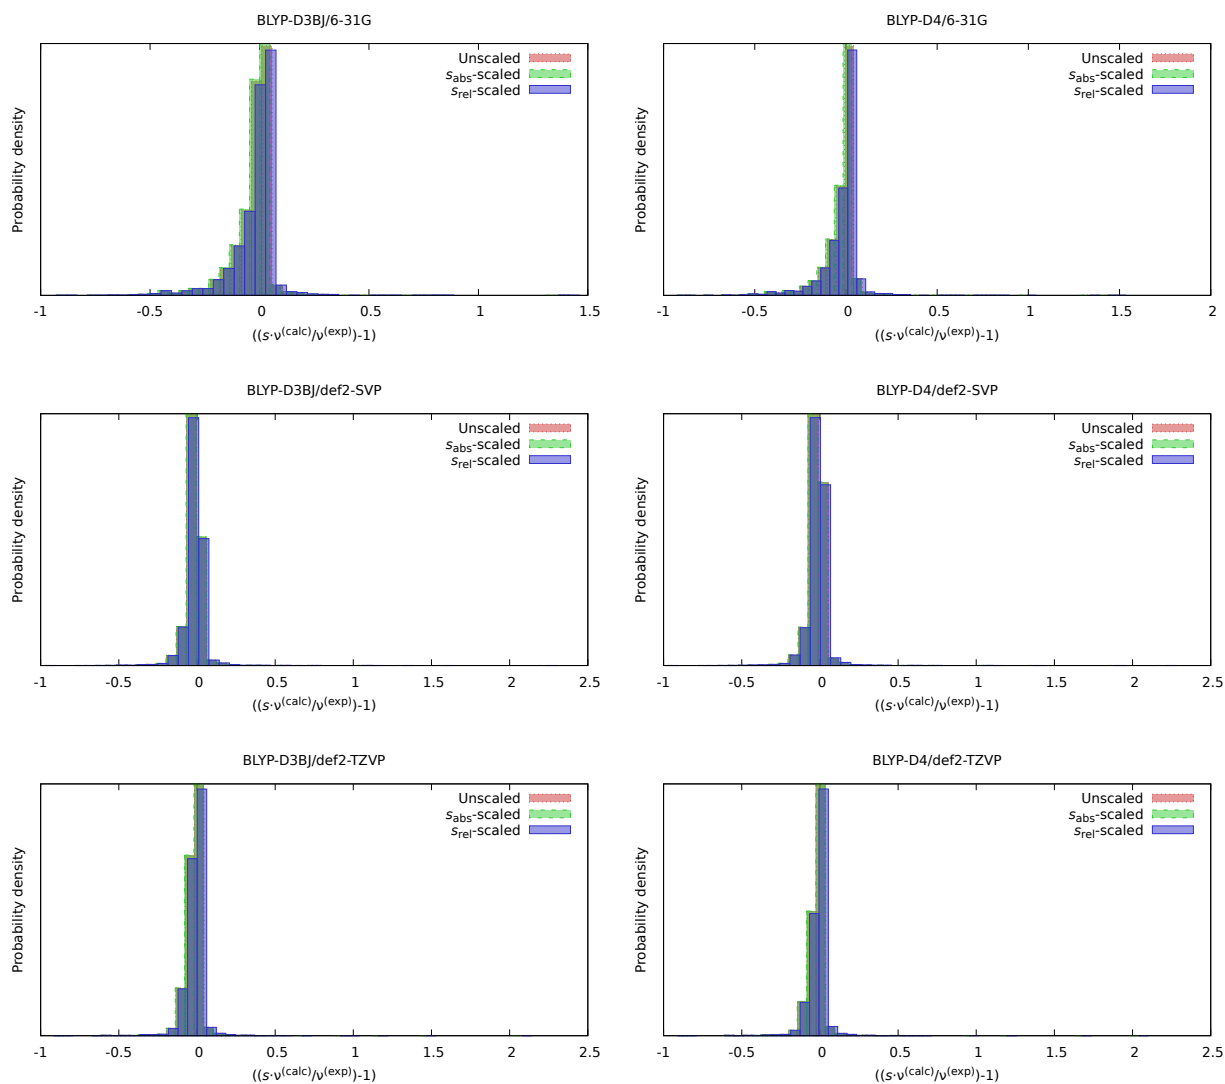

**Figure S6** Relative deviations of the unscaled/ $s_{\text{abs}}$ -scaled/ $s_{\text{rel}}$ -scaled frequencies from the experimental fundamental transitions in the dataset for BLYP-based methods.

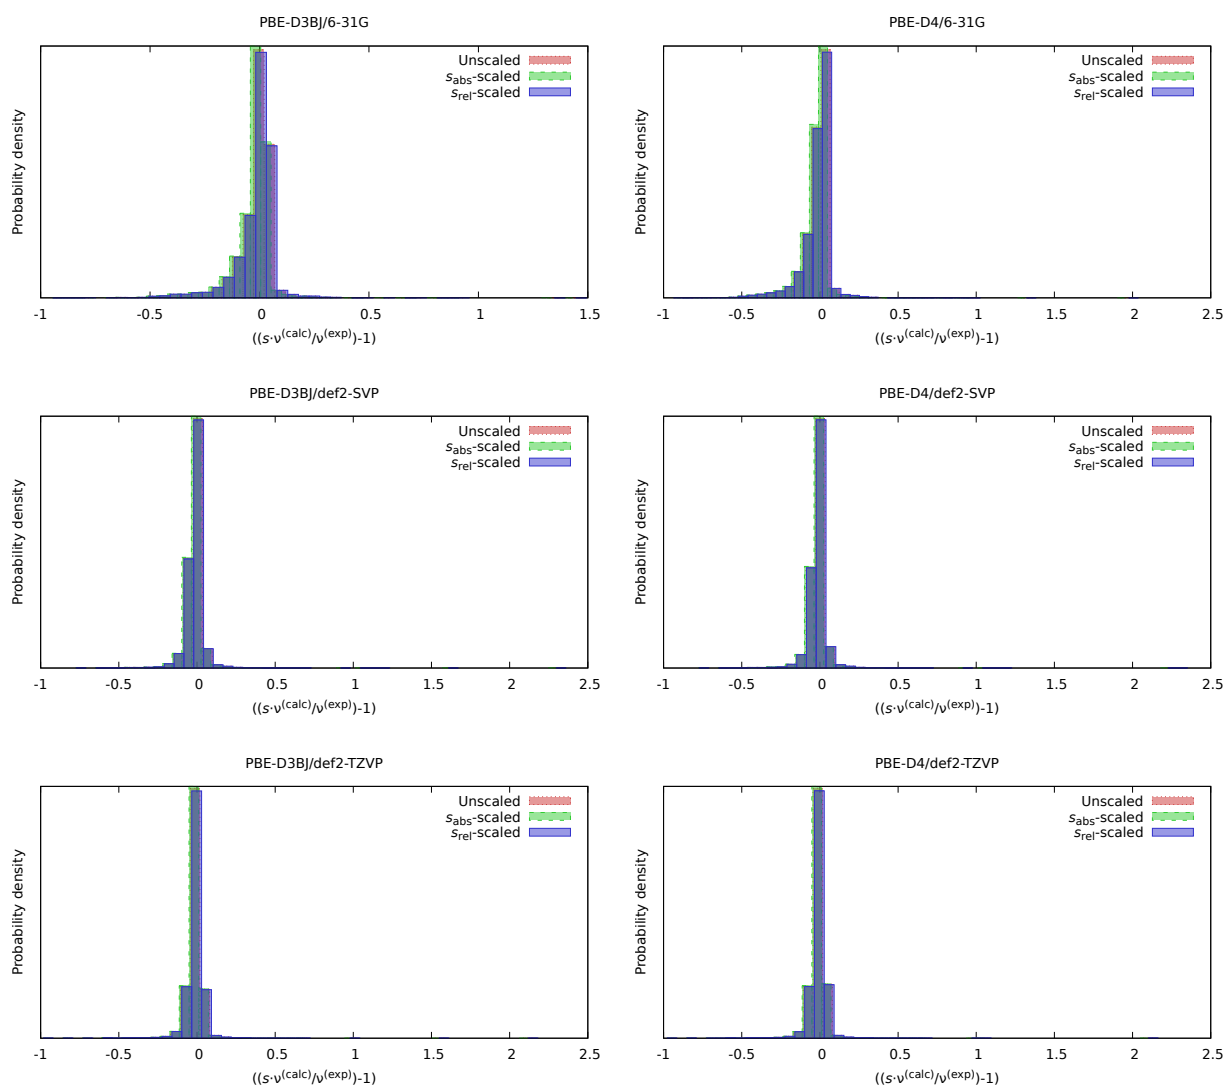

**Figure S7** Relative deviations of the unscaled/ $s_{\text{abs}}$ -scaled/ $s_{\text{rel}}$ -scaled frequencies from the experimental fundamental transitions in the dataset for PBE-based methods.

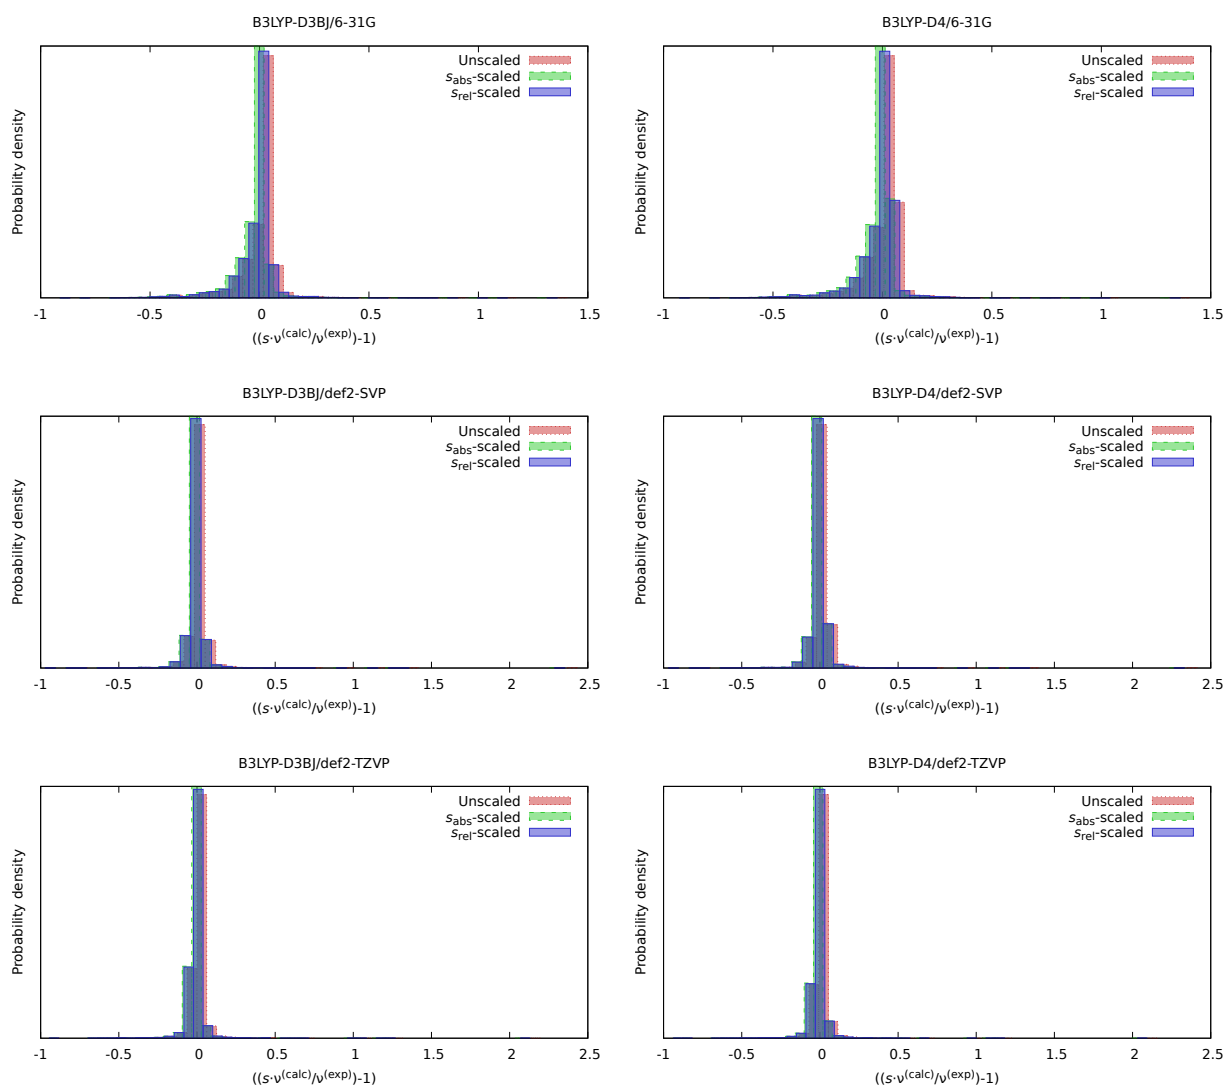

**Figure S8** Relative deviations of the unscaled/ $s_{abs}$ -scaled/ $s_{rel}$ -scaled frequencies from the experimental fundamental transitions in the dataset for B3LYP-based methods.

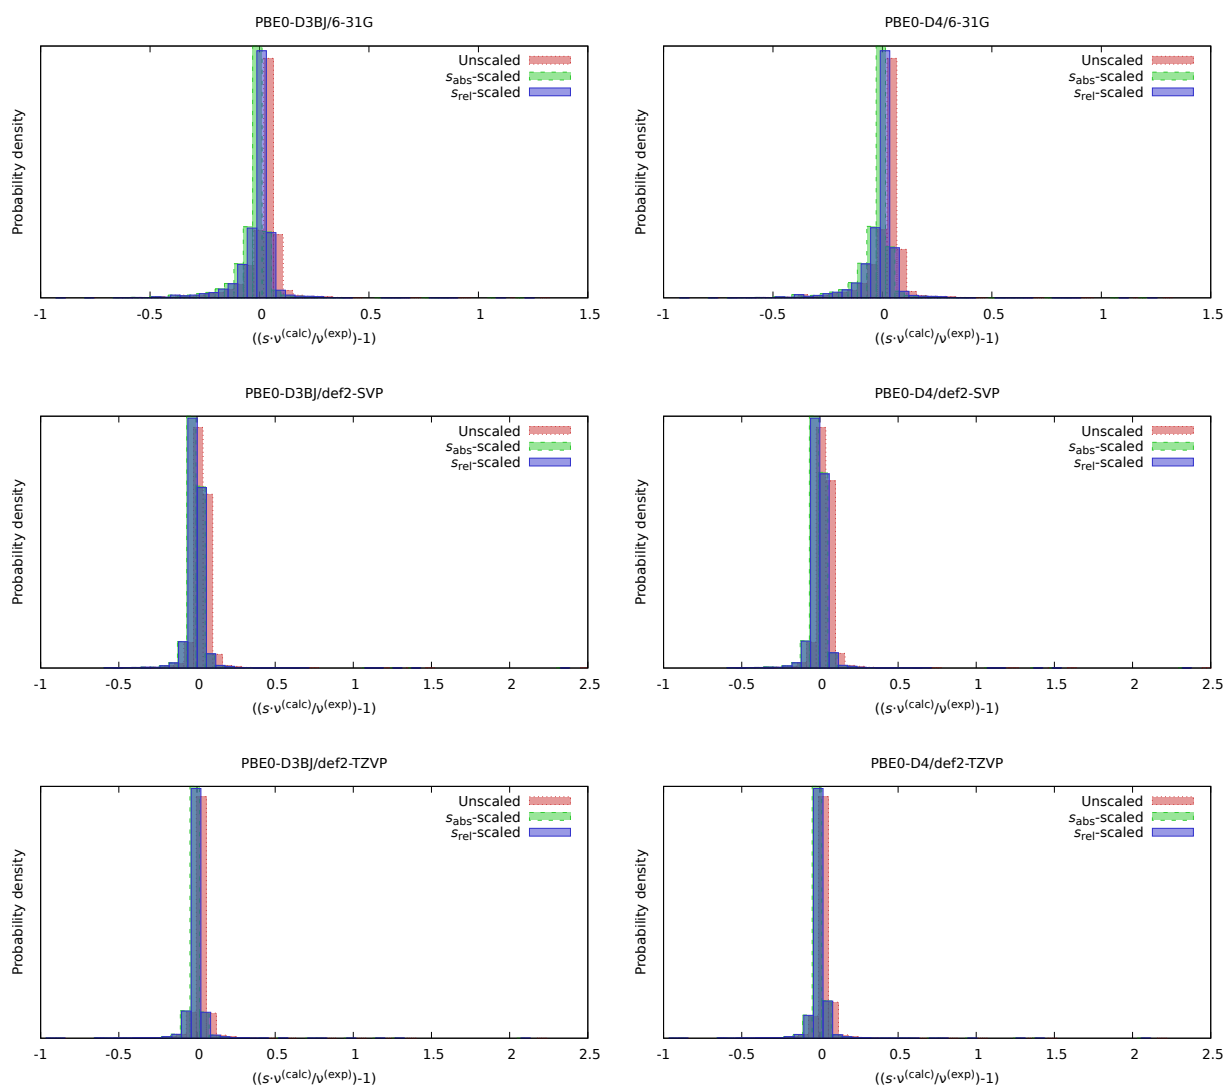

**Figure S9** Relative deviations of the unscaled/ $s_{\text{abs}}$ -scaled/ $s_{\text{rel}}$ -scaled frequencies from the experimental fundamental transitions in the dataset for PBE0-based methods.

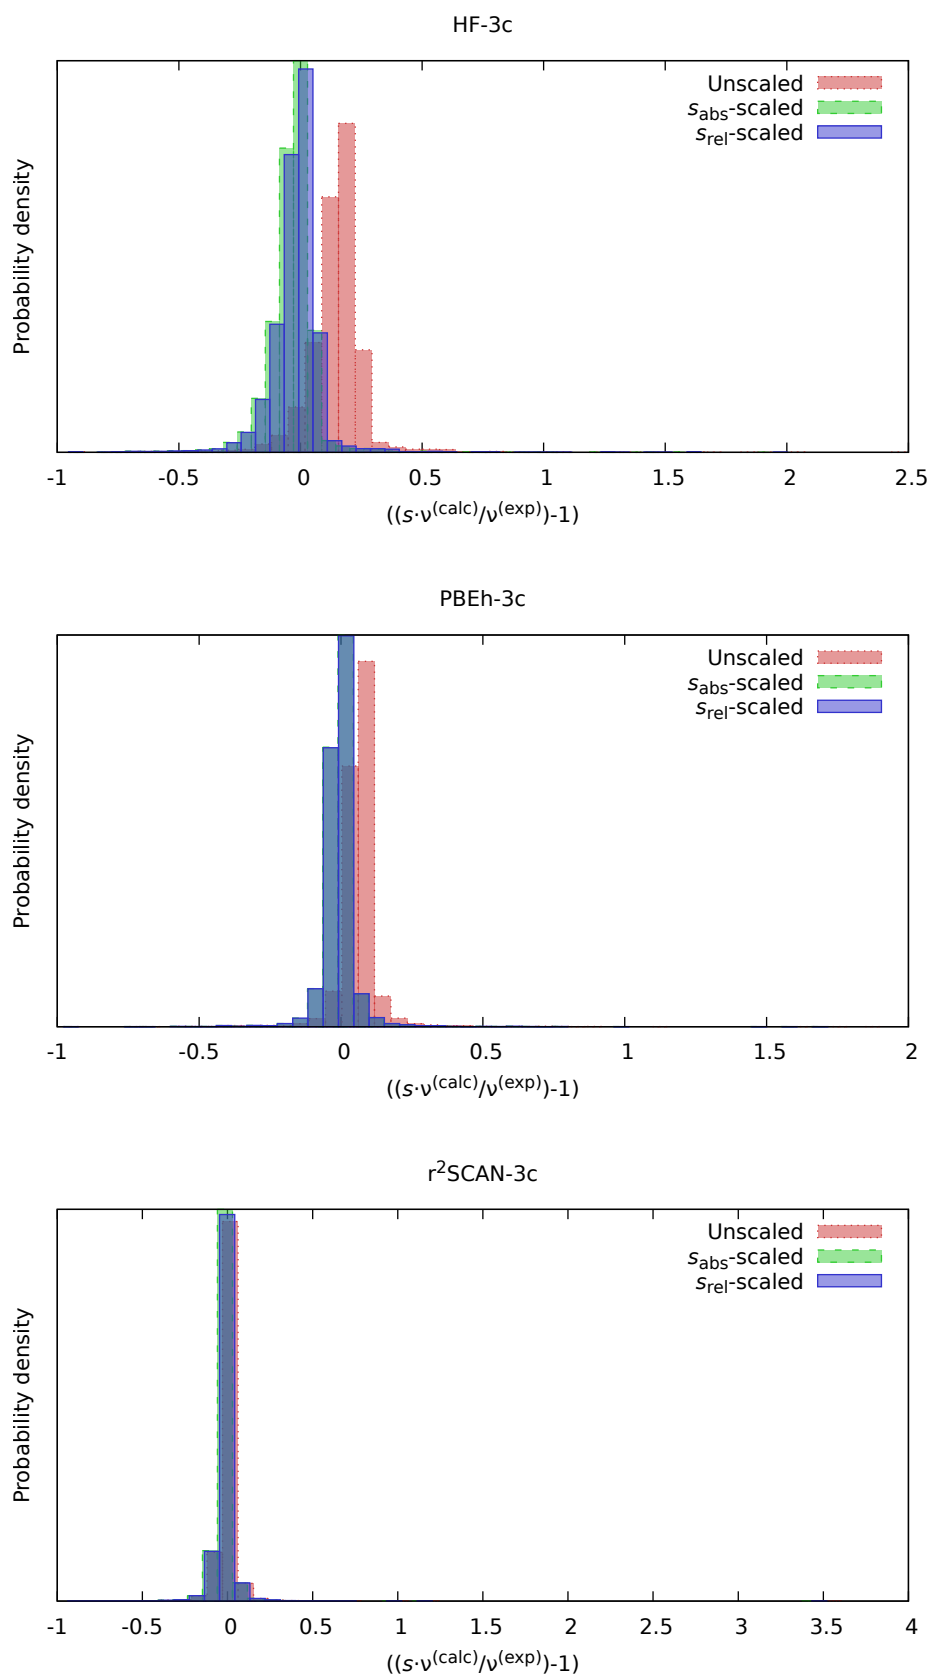

**Figure S10** Relative deviations of the unscaled/ $s_{\text{abs}}$ -scaled/ $s_{\text{rel}}$ -scaled frequencies from the experimental fundamental transitions in the dataset for 3c composite methods.



## 2 Illustrative examples

### 2.1 Pyrene

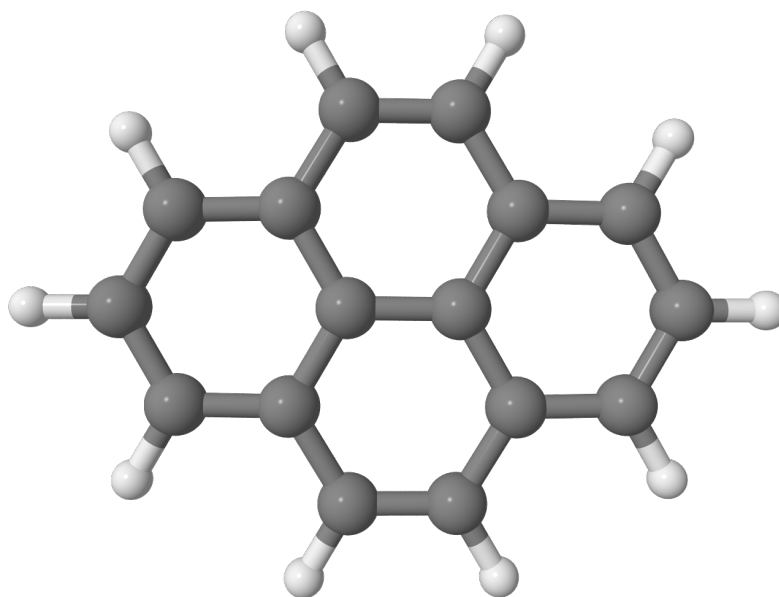

**Figure S11** Molecular structure of pyrene.

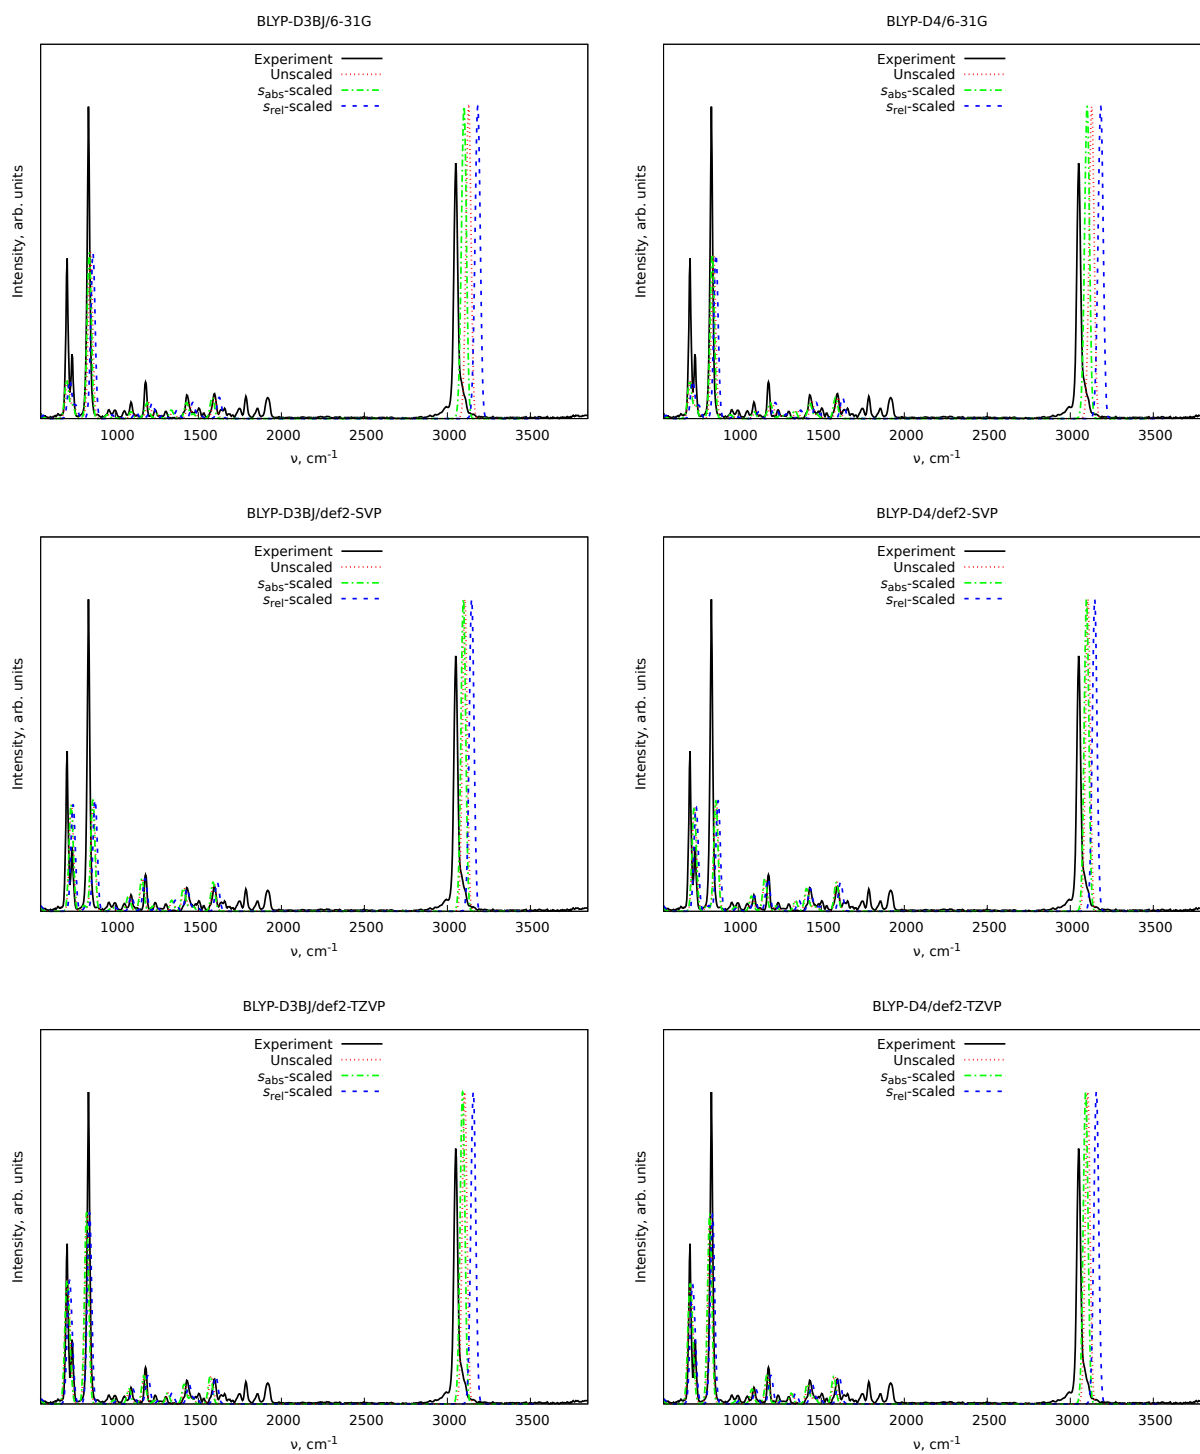

**Figure S12** Unscaled and scaled harmonic and experimental spectra of pyrene. Theoretical harmonic spectra were obtained with BLYP-based methods.

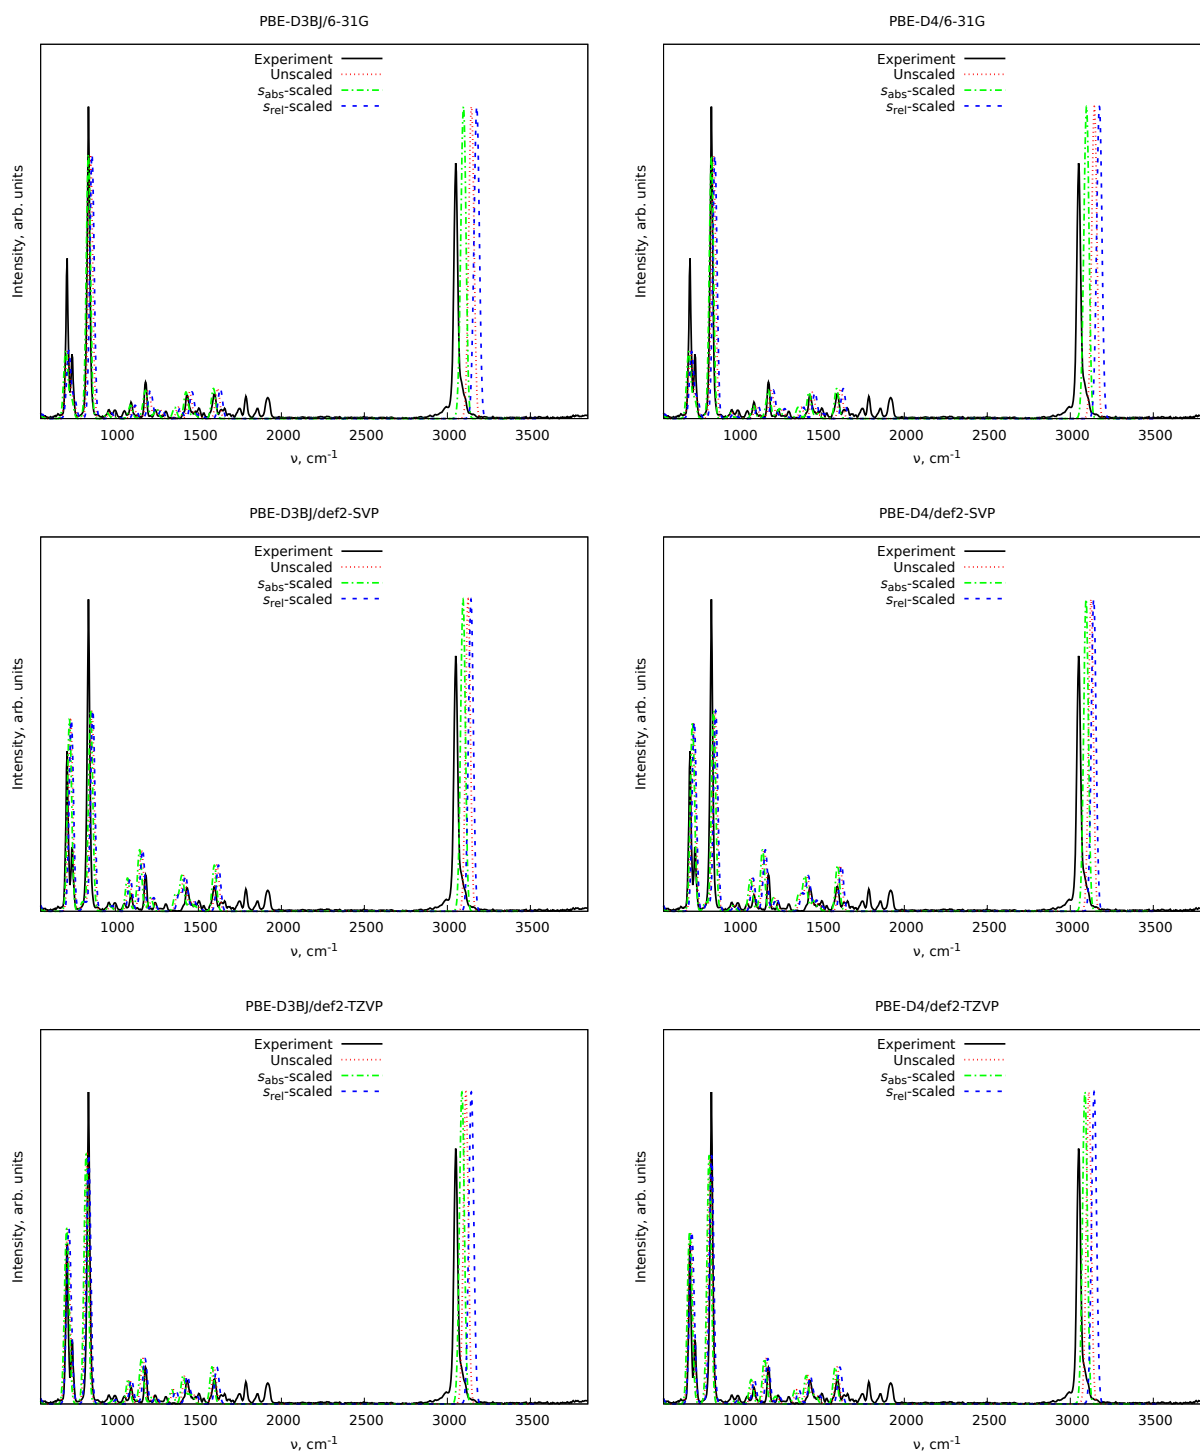

**Figure S13** Unscaled and scaled harmonic and experimental spectra of pyrene. Theoretical harmonic spectra were obtained with PBE-based methods.

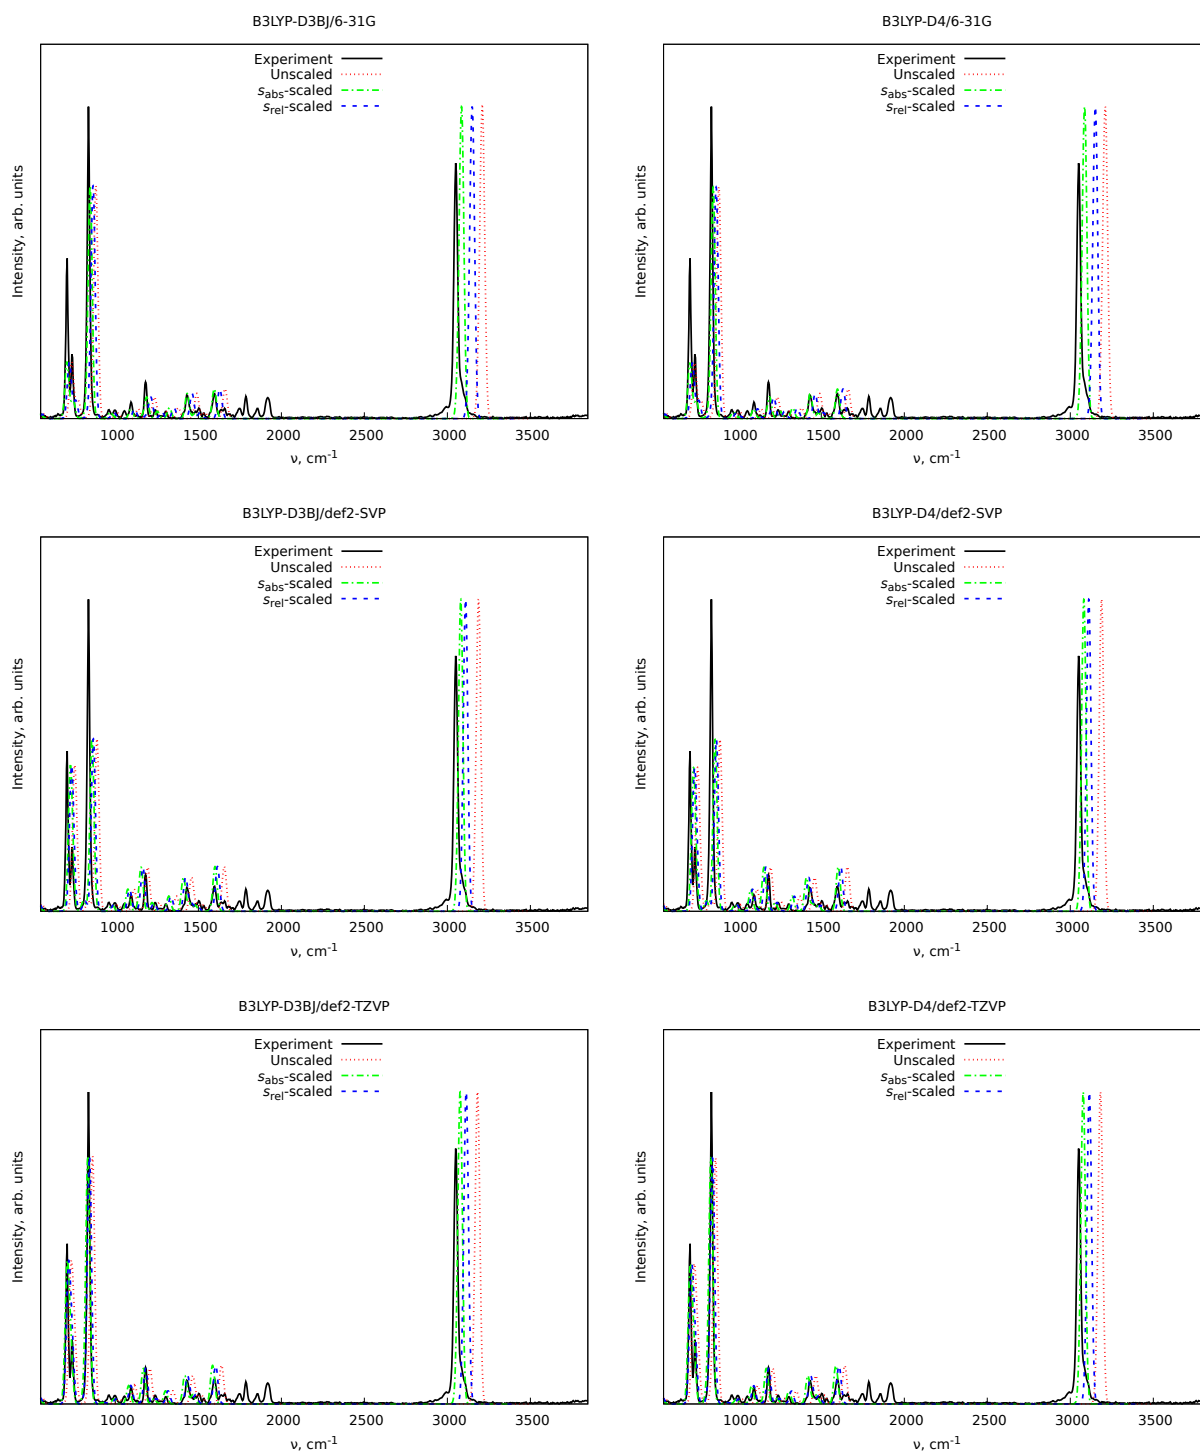

**Figure S14** Unscaled and scaled harmonic and experimental spectra of pyrene. Theoretical harmonic spectra were obtained with B3LYP-based methods.

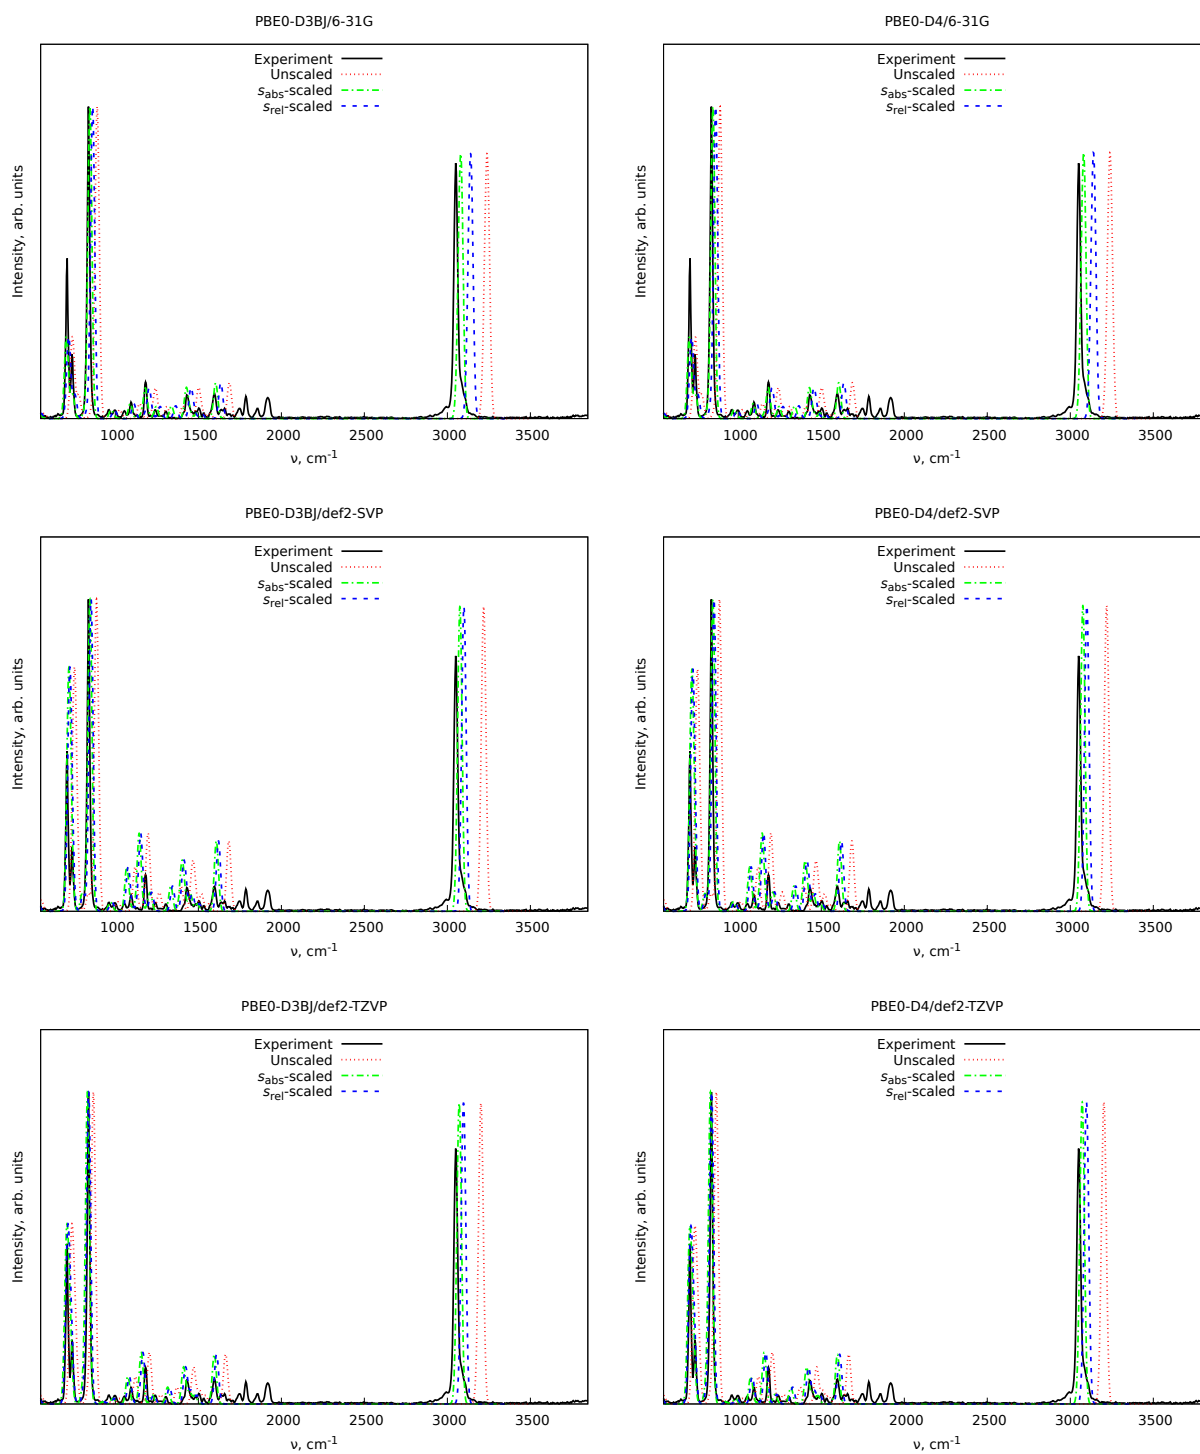

**Figure S15** Unscaled and scaled harmonic and experimental spectra of pyrene. Theoretical harmonic spectra were obtained with PBE0-based methods.

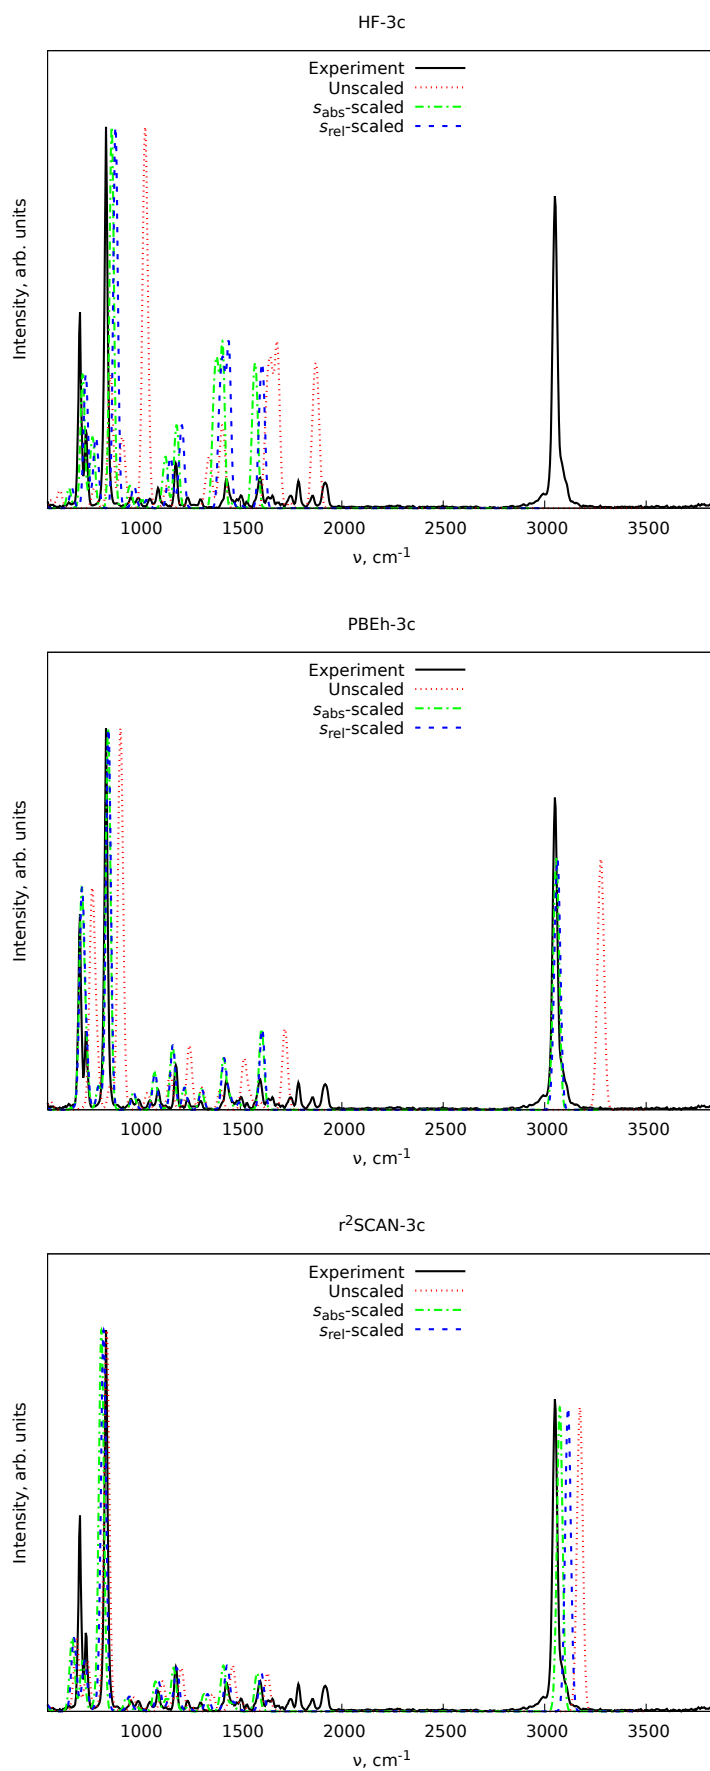

**Figure S16** Unscaled and scaled harmonic and experimental spectra of pyrene. Theoretical harmonic spectra were obtained with 3c composite methods.

## 2.2 Protonated LeuEnk

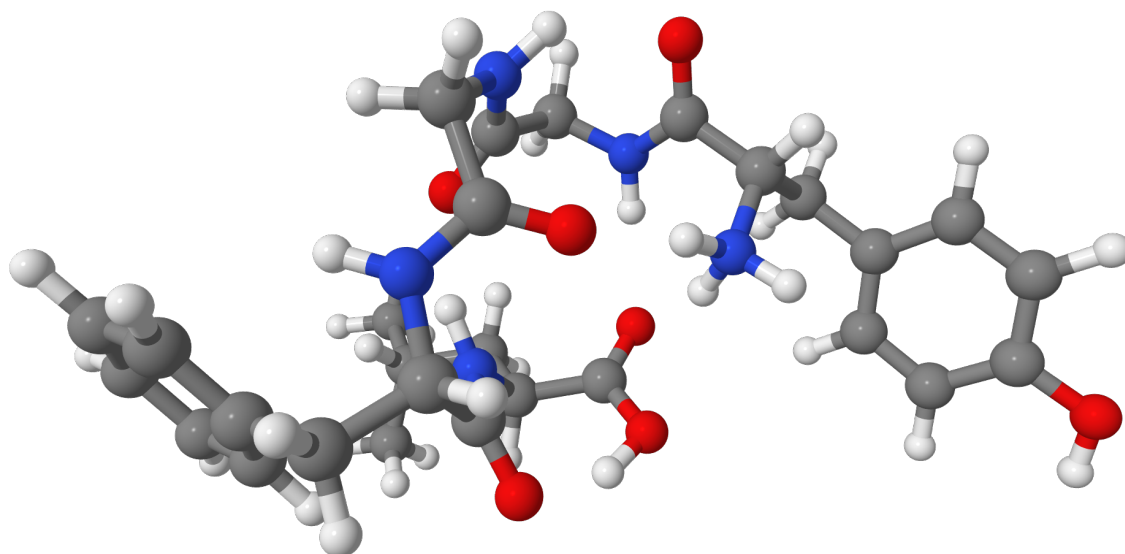

**Figure S17** Molecular structure of the most stable protonated LeuEnk conformer.

## 2.2.1 FELIX spectrum

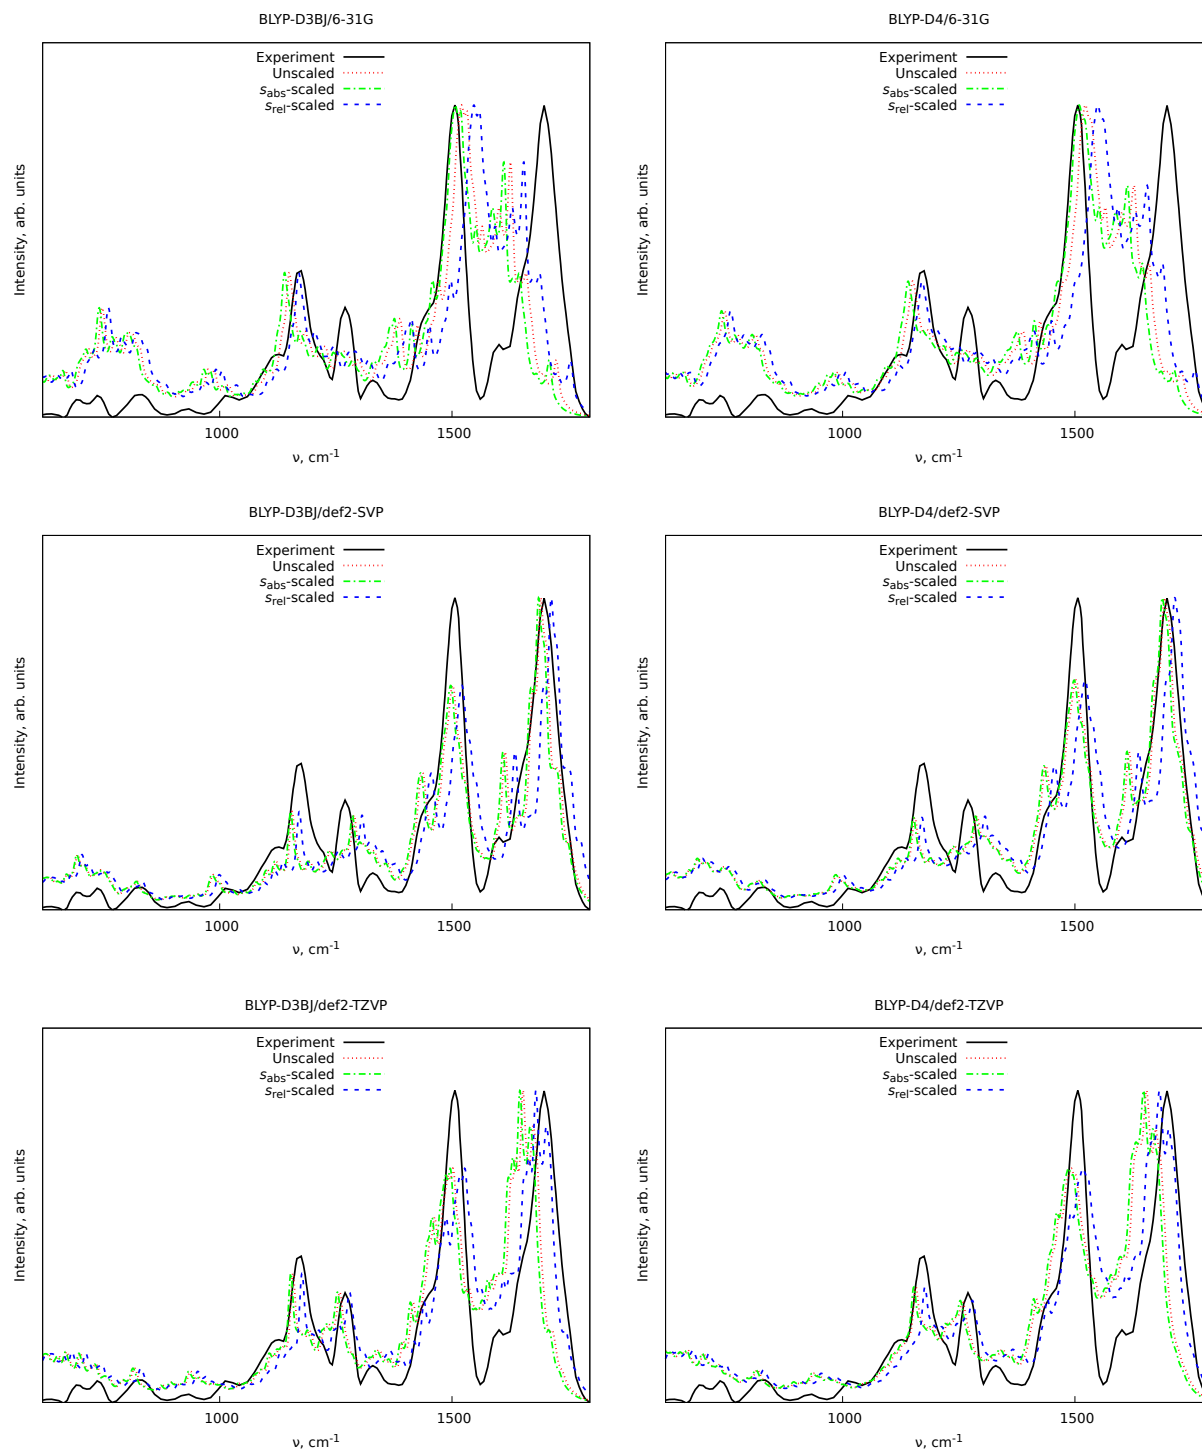

**Figure S18** Unscaled and scaled harmonic and experimental (FELIX) spectra of leuenk. Theoretical harmonic spectra were obtained with BLYP-based methods.



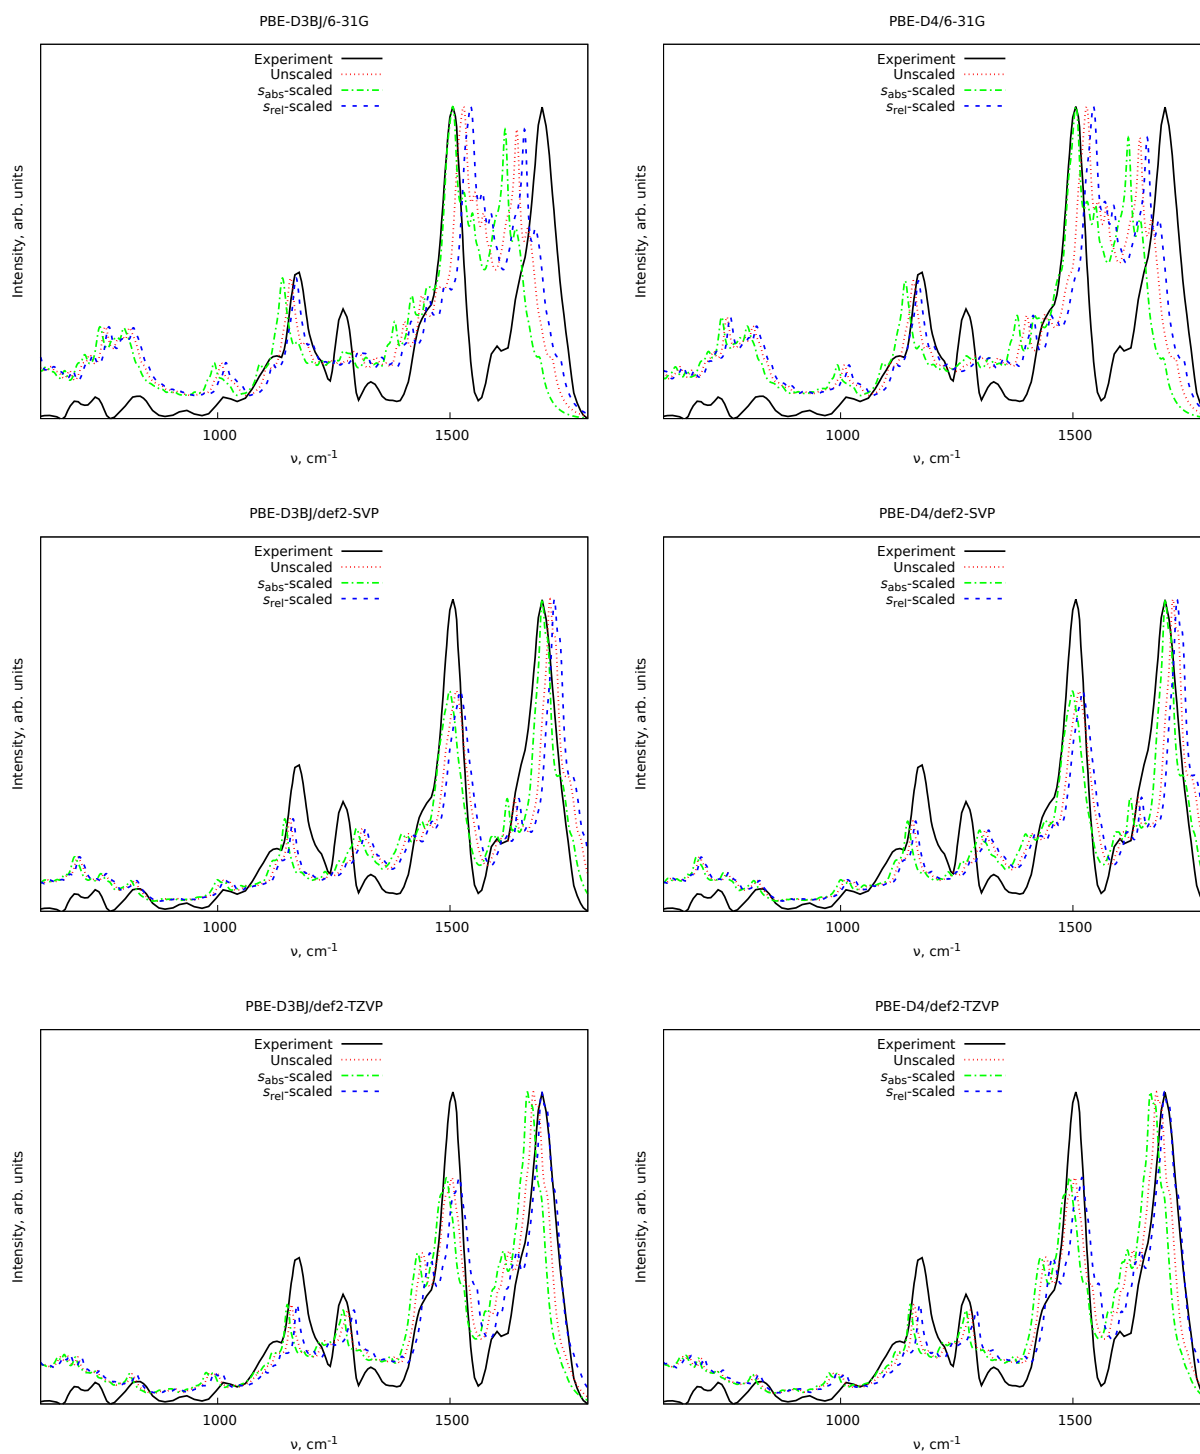

**Figure S19** Unscaled and scaled harmonic and experimental (FELIX) spectra of leuenk. Theoretical harmonic spectra were obtained with PBE-based methods.

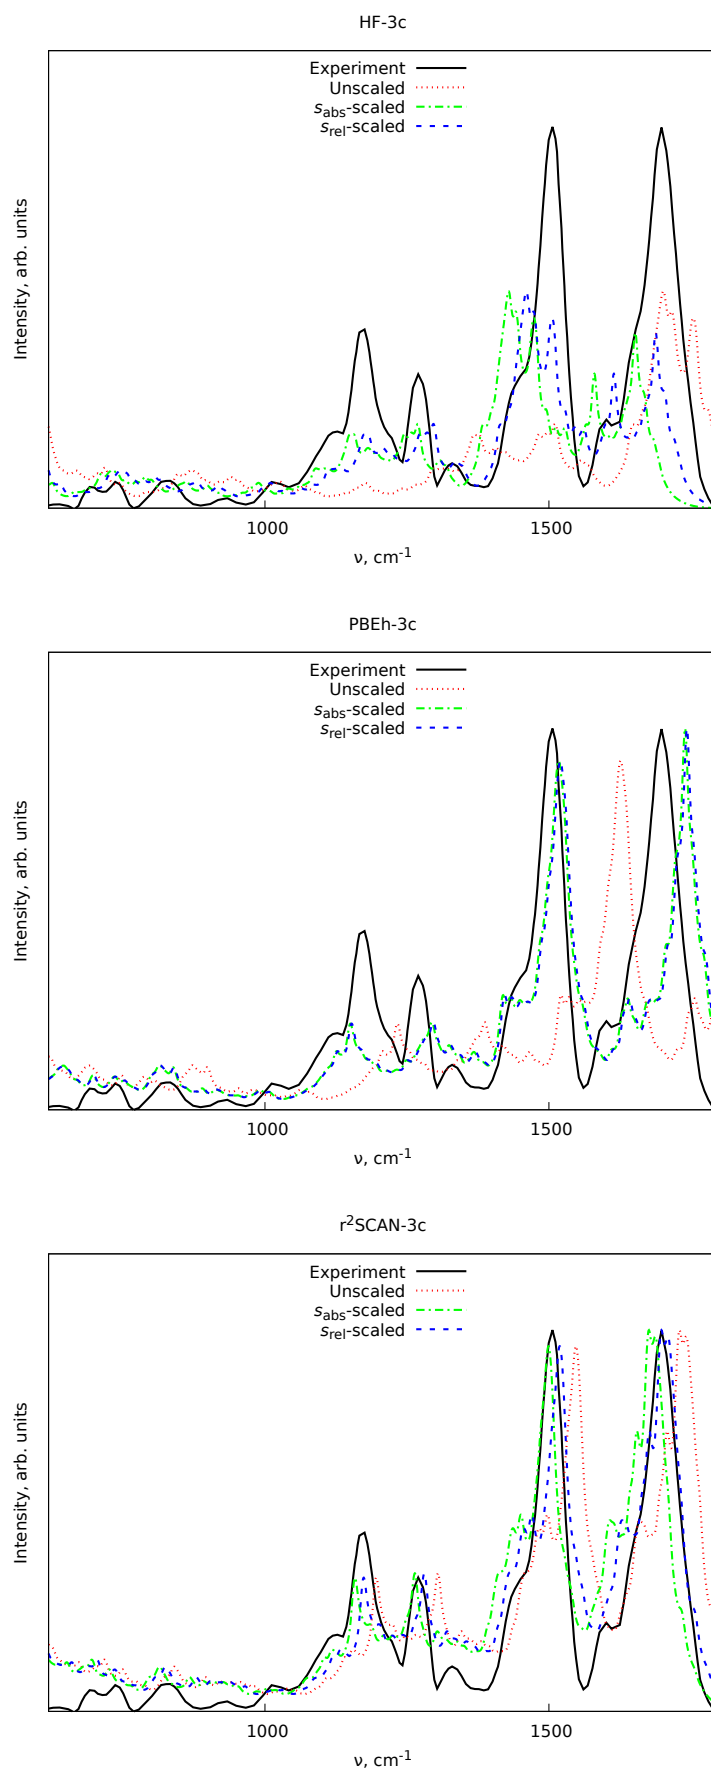

**Figure S20** Unscaled and scaled harmonic and experimental (FELIX) spectra of leuenk. Theoretical harmonic spectra were obtained with 3c composite methods.

## 2.2.2 CLIO spectrum

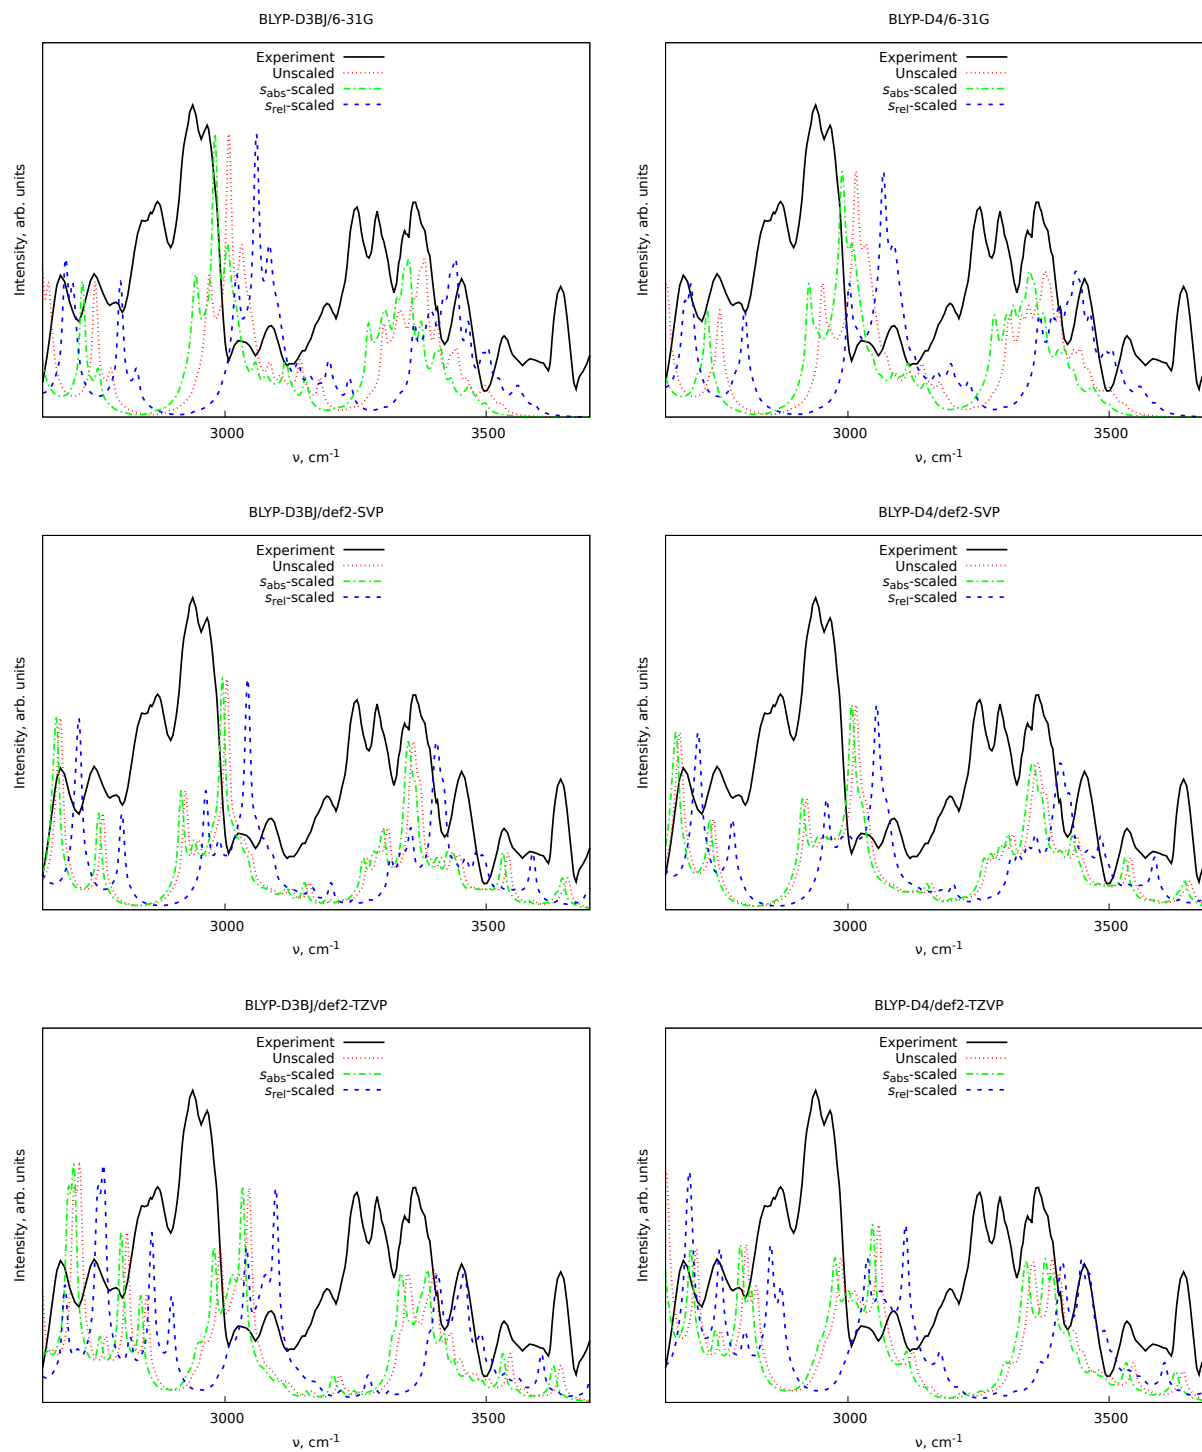

**Figure S21** Unscaled and scaled harmonic and experimental (CLIO) spectra of leucon. Theoretical harmonic spectra were obtained with BLYP-based methods.

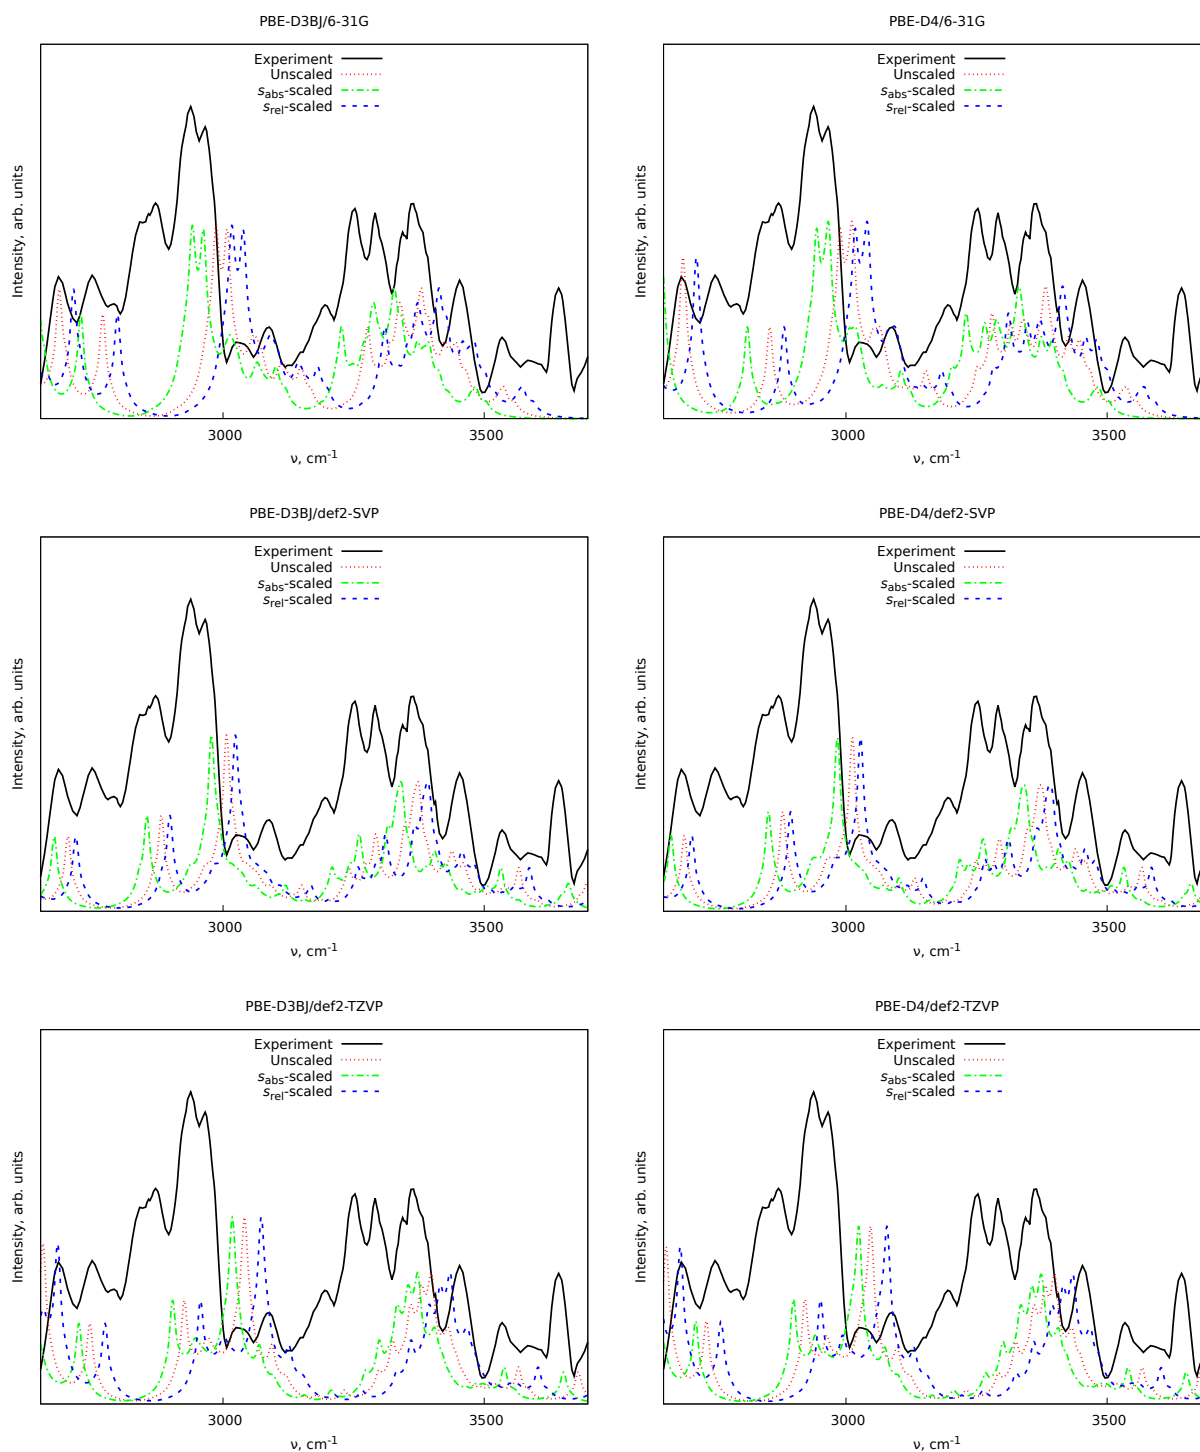

**Figure S22** Unscaled and scaled harmonic and experimental (CLIO) spectra of leucon. Theoretical harmonic spectra were obtained with PBE-based methods.

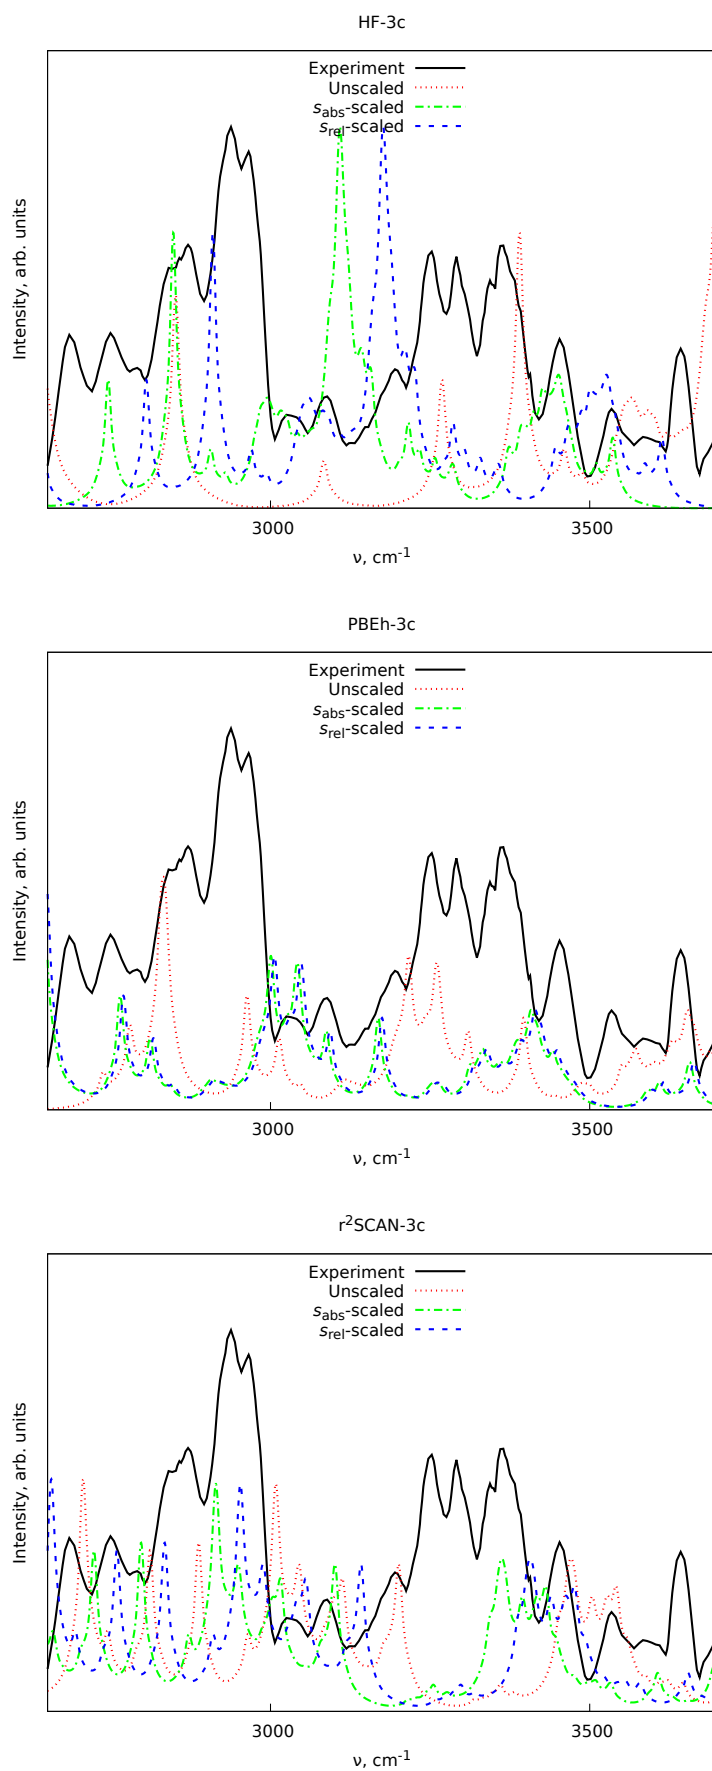

**Figure S23** Unscaled and scaled harmonic and experimental (CLIO) spectra of leuenk. Theoretical harmonic spectra were obtained with 3c composite methods.

## 2.3 Doubly protonated conformer A of gramicidin S

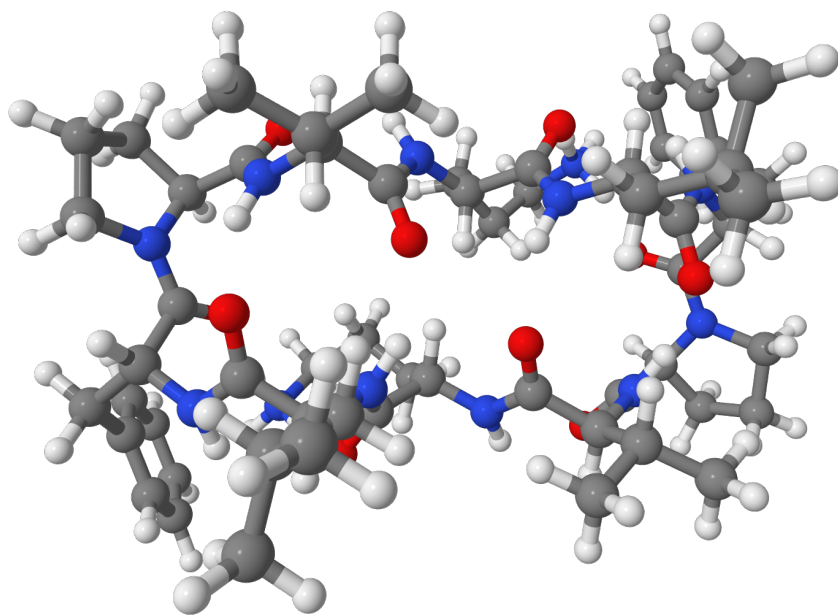

**Figure S24** Molecular structure of the doubly protonated gramicidin conformer A.

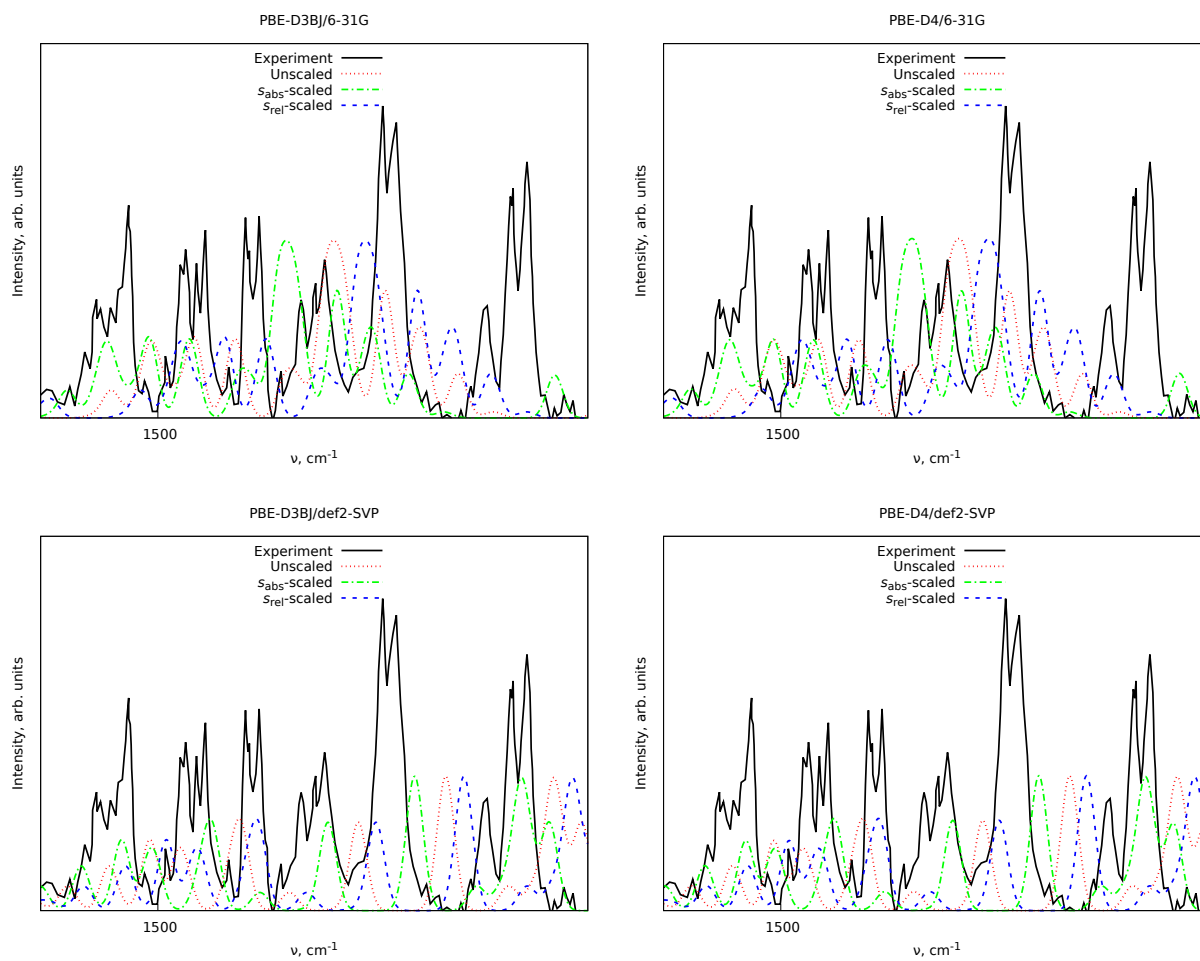

**Figure S25** Unscaled and scaled harmonic and experimental spectra of doubly protonated gramicidin conformer A. Theoretical harmonic spectra were obtained with PBE-based methods.

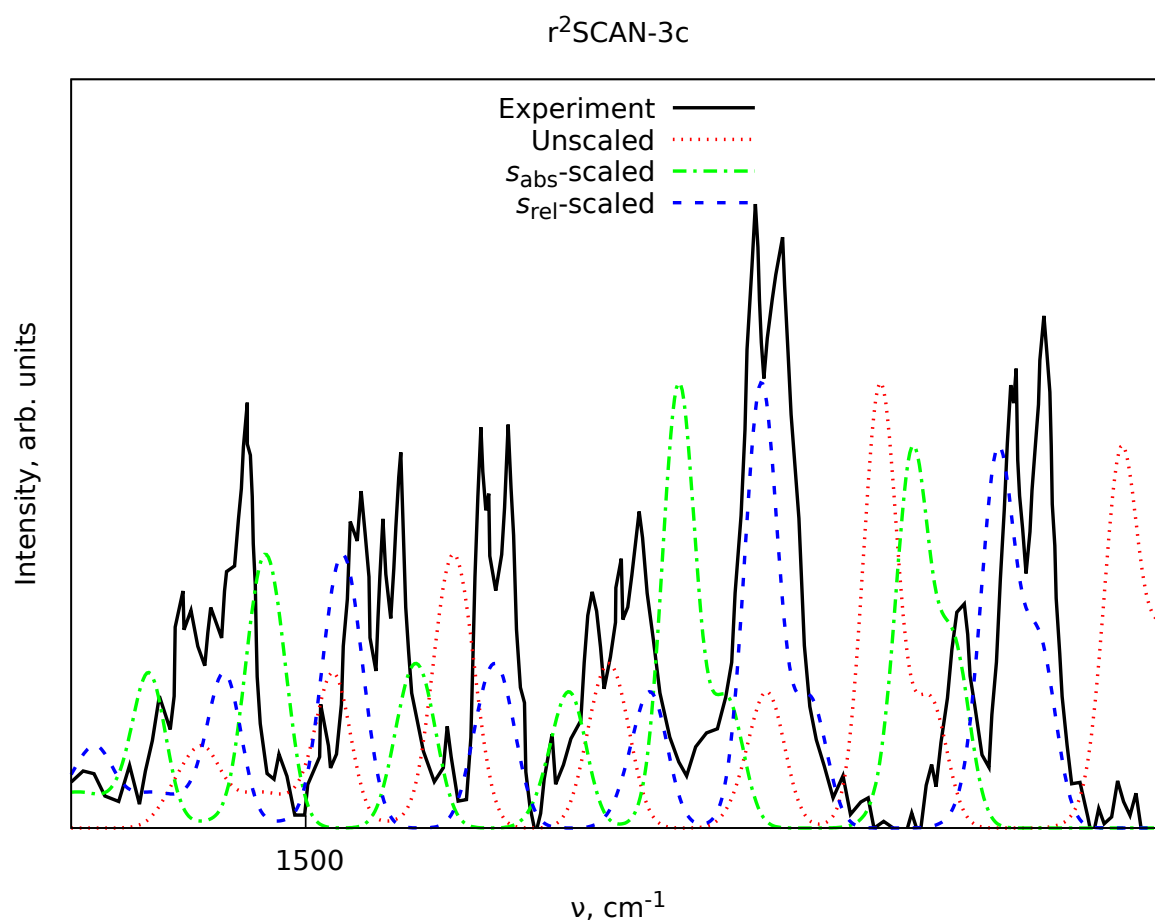

**Figure S26** Unscaled and scaled harmonic and experimental spectra of doubly protonated gramicidin conformer A. Theoretical harmonic spectra were obtained with r<sup>2</sup>SCAN-3c method.
